1 **Correlated expression of archaeal ammonia oxidation machinery**  
2 **across disparate environmental and culture conditions**

3  
4 **Authors:**

5 Paul Carini<sup>1,3</sup>, Christopher L. Dupont<sup>2</sup>, Alyson E. Santoro<sup>1,4</sup>

6  
7 <sup>1</sup>Horn Point Laboratory, University of Maryland Center for Environmental  
8 Science, Cambridge, MD 21613

9 <sup>2</sup>J. Craig Venter Institute, San Diego, CA 92037

10 <sup>3</sup>Present Address: Department of Soil, Water and Environmental Science,  
11 University of Arizona, Tucson, AZ 85721

12 <sup>4</sup>Present address: Department of Ecology, Evolution, and Marine Biology,  
13 University of California, Santa Barbara, CA 93106

14  
15 **Keywords:** Thaumarchaea, nitrification, metatranscriptome, NirK, Nitrogen  
16 cycling

17  
18 **Corresponding Authors:** Alyson Santoro ([alyson.santoro@lifesci.ucsb.edu](mailto:alyson.santoro@lifesci.ucsb.edu))  
19 and Paul Carini ([paulcarini@email.arizona.edu](mailto:paulcarini@email.arizona.edu))

20  
21 **Abstract**

22 Although marine metatranscriptomes suggest planktonic ammonia-  
23 oxidizing thaumarchaea are among the most active microbes in marine  
24 waters<sup>1-4</sup>, we understand little about how thaumarchaeal expression  
25 patterns relate to substrate utilization and activity. Here, we characterize  
26 the global transcriptional response of a marine ammonia-oxidizing  
27 thaumarchaeon, '*Candidatus Nitrosopelagicus brevis*' str. CN25, to  
28 ammonia limitation. We further describe the genome and transcriptome of  
29 *Ca. N. brevis* str. U25, a new thaumarchaeal strain capable of oxidizing  
30 ammonia derived from urea. Ammonium limitation in CN25 resulted in  
31 reduced expression of transcripts coding for core ammonia oxidation  
32 proteins, and increased expression of a gene coding an Hsp20-like  
33 chaperone. Despite significantly different transcript abundances across  
34 treatments, *amoAB*, *nirK* and both ammonium transporter genes were  
35 always among the most abundant transcripts, regardless of growth state.  
36 *Ca. N. brevis* str. U25 cells growing on urea expressed a urea transporter  
37 139-fold more than the urease catalytic subunit *ureC*, indicating that the  
38 expression of urea acquisition machinery is favored over urease genes  
39 during exponential growth. Gene co-expression networks derived from  
40 transcriptomes from CN25 and U25 cultures and ten thaumarchaea-

41 enriched metatranscriptomes revealed a high degree of correlated gene  
42 expression across disparate environmental conditions. We show *nirK* is  
43 tightly co-expressed with *amoABC*, suggesting a central role for NirK in  
44 ammonia oxidation. These findings demonstrate how transcriptomes from  
45 microbial cultures can be used to contextualize and identify gene  
46 expression relationships that are otherwise enigmatic.

47

## 48 **Introduction:**

49 Ammonia-oxidizing thaumarchaea are ubiquitous and abundant in the  
50 oceans, accounting for >30% of all cells below the thermocline<sup>5,6</sup> and are  
51 integral organisms in oxygen minimum zones<sup>4,7-11</sup>. In many marine  
52 environments, thaumarchaeal transcripts are among the most abundant  
53 that can be mapped to available prokaryotic genomes<sup>1-4</sup>. The most  
54 frequently detected thaumarchaeal transcripts encode for proteins involved  
55 in ammonia oxidation and acquisition, including ammonia monooxygenase  
56 subunits (*amoABC*), ammonium transporters (*amtB*), a putative Cu-  
57 containing nitrite reductase (*nirK*), and structural cellular components (for  
58 example, S-layer proteins<sup>12</sup>). In addition to dissolved ammonia, some  
59 marine nitrifying archaea utilize ammonia derived from urease-catalyzed  
60 urea hydrolysis as a chemolithoautotrophic growth substrate<sup>13,14</sup> and  
61 thaumarchaeal urease genes and transcripts have been detected in marine  
62 environments<sup>15-18</sup>. Despite the abundance of thaumarchaeal transcripts in  
63 natural assemblages, we still have a poor understanding of how the relative  
64 abundance of thaumarchaeal transcript markers such as *amoA*, *nirK* and  
65 *ureC* relate to nutrient availability across environmental gradients.

66

67 Thaumarchaeal ammonia oxidation is initiated by the oxidation of ammonia  
68 to hydroxylamine (NH<sub>2</sub>OH) by the ammonia monooxygenase enzyme  
69 complex (Amo)<sup>19</sup>, but the enzyme(s) catalyzing the oxidation of NH<sub>2</sub>OH to  
70 nitrite (NO<sub>2</sub><sup>-</sup>) have not been confirmed in thaumarchaea<sup>20</sup>. Orthologs of the  
71 bacterial hydroxylamine oxidoreductase (Hao) or c-type cytochrome  
72 synthesis and assembly machinery, thought to be required for NH<sub>2</sub>OH  
73 oxidation and electron transfer in ammonia-oxidizing bacteria (AOB)<sup>21</sup>, are  
74 absent from all sequenced thaumarchaeal genomes<sup>22-24</sup>. Instead,  
75 unidentified Cu-containing metalloenzymes or F<sub>420</sub>-dependent  
76 monooxygenases are speculated to be involved in NH<sub>2</sub>OH oxidation and  
77 electron transfer to archaeal terminal oxidases<sup>20,25</sup>. and may involve nitric  
78 oxide (NO) as either a direct intermediate or an electron shuttle<sup>26-28</sup>. While  
79 the precursor to NO has not yet been elucidated, all free-living  
80 thaumarchaea with complete genomes encode a Cu-containing

81 multicopper oxidase with homology to Cu nitrite reductases (NirK) and may  
82 be responsible for the reduction of  $\text{NO}_2^-$  to  $\text{NO}^{25}$ .

83

84 '*Candidatus Nitrosopelagicus brevis*' str. CN25 is a cultured representative  
85 of ubiquitous and abundant pelagic thaumarchaeal populations in the  
86 shallow oligotrophic ocean<sup>24,29</sup>. Here, we describe the genome and  
87 transcriptome during urea based growth of a *Ca. N. brevis* strain that can  
88 utilize ammonia cleaved from urea as a sole chemolithoautotrophic growth  
89 substrate. Additionally, we use *Ca. N. brevis* str. CN25 to investigate the  
90 transcriptional response to ammonium limitation in laboratory culture.  
91 These transcriptomes are further analyzed in the context of several marine  
92 metatranscriptomes and used to identify conserved gene co-expression  
93 networks.

94

## 95 **Results and Discussion**

96

97 '***Candidatus Nitrosopelagicus brevis*' strain U25 genome and**  
98 **transcriptome:** *Ca. N. brevis* str. CN25 was originally enriched using  
99 ammonium as the sole chemolithoautotrophic growth substrate<sup>29</sup>. A urea-  
100 utilizing enrichment was obtained from this original CN25 enrichment via  
101 subculturing with urea as a sole nitrogen and energy source. This second  
102 lineage was used for the shotgun metagenome sequencing and  
103 experiments described here. After assembly and contig binning based on  
104 nucleotide frequencies and coverage, we obtained a three contig genome  
105 of this urea-utilizing thaumarchaeon (Supplementary Figure 1a). This  
106 genome is nearly identical to the *Ca. N. brevis* CN25 genome with regards  
107 to *i*) gene content; *ii*) genome organization (Supplementary Figure 1b); and  
108 *iii*) genome wide average nucleotide identity (99.99%; Supplementary  
109 Figure 2). We found 19 additional genes at four distinct genomic loci in this  
110 strain, relative to CN25 (Supplementary Table 1). The largest of these  
111 insertions (15 contiguous genes) includes 11 genes coding urea utilization  
112 machinery, including *ureABCDEFG*, which codes for urease and its  
113 chaperones, two urea sodium:solute symporter family (SSSF) transporters,  
114 a transcriptional regulator and several hypothetical proteins (Fig. 1a). We  
115 designate this urea-utilizing thaumarchaeon '*Candidatus Nitrosopelagicus*  
116 *brevis*' strain U25.

117

118 We sequenced a transcriptome from *Ca. N. brevis* str. U25 growing  
119 exponentially with urea as the growth substrate. Only one transcript from  
120 the chromosomal insertion containing the urea transport and metabolism

121 genes (Fig. 1a) was among the top 50 transcripts detected: A7X95\_00990,  
122 coding for a putative urea SSSF transporter (ranked  $13.7 \pm 0.33$ ; mean  $\pm$   
123 SE,  $n = 3$ ). Surprisingly, transcripts coding for catalytic urease components,  
124 or the second putative urea SSSF transporter (A7X95\_00985) located  
125 immediately adjacent to A7X95\_00990, were not nearly as abundant as  
126 A7X95\_00990. For example, the mean expression levels of *ureC*, coding  
127 for the fused catalytic  $\alpha\beta$ -subunit of urease, and *ureA* ( $\gamma$  urease subunit)  
128 were 139 and 784-fold less abundant than that of A7X95\_00990,  
129 respectively (ranked  $390 \pm 19.7$  and  $950 \pm 50.8$ , respectively; mean  $\pm$  SD,  
130  $n=3$ ). A7X95\_00985, coding for the second urea SSSF transporter, was  
131 also expressed at a low level, comparable to *ureA*, ranked  $940 \pm 92.0$ .  
132 During growth on urea, transcripts for genes coding for an ammonium  
133 transporter (AMT1), ammonia monooxygenase subunits (*amoAB*) and  
134 nitrite reductase (*nirk*) were within the top ten most abundant transcripts  
135 detected in strain U25.

136  
137 Although urea utilization genes have been detected in wild thaumarchaeal  
138 populations, we have a poor understanding of how the abundances of  
139 urease transcripts relate to growth and activity. To contextualize the  
140 expression patterns observed in U25, we compared the relative rank of the  
141 transcript abundances for only those genes coding for urea uptake and  
142 catabolism (Fig. 1a) under laboratory growth conditions to the relative rank  
143 of the transcript abundances of the same genes from several deeply  
144 sequenced marine metatranscriptomes. The SSSF urea transporter  
145 (A7X95\_00990) was the most abundant urea-related gene transcript in  
146 38% of the environmental datasets ( $n=8$ ) we investigated (Fig. 1b). In  
147 contrast to culture conditions, where the SSSF urea transporter was the  
148 most abundant urea-related gene transcript, *ureC* was the most abundant  
149 transcript in 25% of the environmental datasets (Fig. 1b). This shows that  
150 variability in the relative transcriptional activity of urea transport and  
151 catabolism genes is not unusual. Our finding that *ureC* was not highly  
152 expressed in exponentially growing cells also helps to explain previous field  
153 observations of low *ureC* expression, and suggests the abundance of *ureC*  
154 transcripts may be a poor molecular biomarker of active urea-based  
155 nitrification. For example, *ureC* expression and urea-based nitrification  
156 were found to be only weakly correlated across several environments<sup>30</sup>, in  
157 contrast to high correlation between *amoA* expression and ammonia  
158 oxidation rates<sup>31</sup>. Similarly, in Arctic samples collected across seasons,  
159 *ureC* genes were detected, yet *ureC* transcripts were only sporadically  
160 detected and at low abundances<sup>17</sup>.

161  
162 **Transcriptional response to ammonium limitation in ‘*Ca. N. brevis*’**  
163 **strain CN25:** To understand adaptive mechanisms during ammonium  
164 starvation, we explored the transcriptional response of *Ca. N. brevis* CN25  
165 to ammonium limitation. A total of 51 gene transcripts were differentially  
166 abundant when comparing the exponential growth phase of CN25 to  
167 ammonium-limited stationary phase (generalized linear model likelihood  
168 ratio test  $FDR \leq 0.01$  and  $\geq 2$ -fold change in abundance; Supplementary  
169 Table 2). The gene transcripts that were significantly less abundant in  
170 stationary phase included *amoA*, *amoB*, *nirK*, both *amtB*-like ammonium  
171 transporters (AMT1=T478\_1378; AMT2=T478\_1350), several additional  
172 Cu-containing metalloenzymes, and two ferredoxin-like 4Fe-4S binding  
173 domain proteins (Fd1=T478\_1472 and Fd2=T478\_1259) (Fig. 2,  
174 Supplementary Table 2). These results are similar to previous studies  
175 where ammonium limitation of the ammonia-oxidizing thaumarchaeon  
176 *Nitrosopumilus maritimus* was characterized by a reduction in transcript  
177 abundances related to energy metabolism and ammonium acquisition<sup>12</sup>.  
178 Only two genes, T478\_1481, coding an Hsp20/ $\alpha$ -crystallin domain small  
179 heat shock protein, and T478\_1394, annotated as a hypothetical protein,  
180 were significantly more abundant (~10-fold) in ammonium-limited stationary  
181 phase (Fig. 2, Supplementary Table 2). Hsp20 is a molecular chaperone  
182 that enhances thermotolerance and binds to unfolded proteins to prevent  
183 aggregation<sup>32</sup>.

184  
185 The upregulation of Hsp20 transcripts and concomitant downregulation of  
186 transcripts coding enzymes integral to energy production suggests that one  
187 adaptation to ammonium-limited stationary phase is to protect existing  
188 proteins from degradation. While it is important to note that our  
189 experimental design cannot distinguish between responses to energy  
190 limitation versus anabolic nitrogen limitation, a similar lack of transcriptional  
191 response to ammonium limitation was previously observed in both AOB  
192 and oligotrophic marine bacteria. For example, our finding that transcripts  
193 of only a few genes are more abundant during ammonium starvation  
194 parallels studies of ammonium limitation in the bacterium *Nitrosomonas*  
195 *europaea*<sup>33</sup>. Interestingly, despite *amoC* being abundant in both exponential  
196 and stationary phases (the 13<sup>th</sup> and 7<sup>th</sup> most abundant transcript,  
197 respectively) we did not observe a significant difference in the abundance  
198 of *amoC* between growth phases, which has been implicated in stress  
199 response in *N. europaea*<sup>34</sup>. Like our results with *Ca. N. brevis* CN25, the  
200 marine chemoorganoheterotroph ‘*Candidatus Pelagibacter ubique*,’ did not

201 differentially regulate any genes in response to ammonium limitation<sup>35</sup>.  
202 Despite the lack of transcriptional differences in *Ca. P. ubiquus*, the  
203 abundances of several peptides related to nitrogen metabolism did change  
204 significantly upon nitrogen limitation, including the molecular chaperone  
205 protein GroEL<sup>35</sup>. The similar transcriptional responses to nitrogen starvation  
206 by *Ca. N. brevis* and *Ca. P. ubiquus* are consistent with the limited capacity  
207 of marine oligotrophs to respond rapidly to environmental change<sup>36,37</sup>.

208  
209 Despite significantly different transcript abundances of essential ammonia  
210 oxidation and transport genes across growth conditions, the rank order of  
211 these transcripts within a given treatment were similar, irrespective of  
212 growth condition. That is, the most abundant gene transcripts in  
213 exponential phase were generally still the most abundant transcripts in  
214 ammonium-limited stationary phase (Fig. 2b). For example, transcripts for  
215 32 genes (64%) were in the top 50 most abundant transcripts in both  
216 exponential and stationary phase (Fig. 2b). Interestingly, the abundances of  
217 18 of these transcripts were also significantly different across treatments  
218 (red points in Fig. 2b), illustrating that although transcripts can be  
219 differentially abundant across paired treatments, the changes in their  
220 relative cellular abundance may be subtler. Several of these consistently  
221 abundant but differentially expressed transcripts are common molecular  
222 markers predicted to be essential for ammonia oxidation and transport,  
223 including the ammonium transporters AMT1 and AMT2, ammonia  
224 monooxygenase subunits (*amoAB*) and nitrite reductase (*nirK*).

225  
226 **Correlated gene expression across disparate environments:** Controlled  
227 laboratory experiments such as those described above help us to  
228 understand gene regulation by isolating one experimental variable at a  
229 time. However, gene expression patterns observed in natural  
230 thaumarchaeal populations are the result of cells responding to complex  
231 environmental conditions that can be cryptic and therefore difficult to mimic  
232 in the laboratory. To identify clusters of co-expressed genes across  
233 disparate environmental conditions, and relate them to our laboratory  
234 findings, we constructed and analyzed a gene expression correlation  
235 network constructed from transcriptomes of exponentially growing CN25  
236 and U25 cultures and ten marine metatranscriptomes. The transcription of  
237 1,407 of the 1,464 non-redundant genes in the two *Ca. N. brevis* genomes  
238 were significantly positively correlated with at least one other gene  
239 (Pearson's  $r \geq 0.80$ ,  $q \leq 0.025$ ; Fig. 3, Supplementary Table 3). Network  
240 modularity is a measure of the group connectivity within a network, where

241 connections contained within a module are denser than connections  
242 between modules. Modularity values range from -0.5 to 1, where 1  
243 describes a highly modular system. The modularity of this positive  
244 correlation network was 0.71, indicating a high degree of modularity. Genes  
245 with positively correlated expression organized into 38 groups (modules),  
246 ranging in membership size from 2 to 236 genes (mean module size = 38.0  
247 genes).

248  
249 Genes encoding putative components of the core ammonia oxidation and  
250 transport machinery are significantly co-expressed across distinct  
251 environmental and laboratory conditions. A single 15-gene module (module  
252 11 in Fig. 3) contained: *amoABCX*, *AMT1*, *nirK*, two PEFG-CTERM domain  
253 proteins, Fd1 and Fd2, an Fe-S cluster assembly protein, a membrane  
254 bound cupredoxin-containing protein, and three hypothetical proteins.  
255 Further investigation of these hypothetical proteins suggests that  
256 (T478\_0057) is a putative archaeal cell division protein related to the  
257 endosomal sorting complexes involved in membrane trafficking (ESCRT)-  
258 III<sup>38,39</sup>. Our finding that *amoA*, *amoB* and *nirK* transcripts are abundant and  
259 co-expressed with other genes coding for membrane-bound Cu-containing  
260 metalloproteins (T478\_1362 and T478\_0895) implies the products of these  
261 genes may participate in ammonia oxidation. In contrast to this, previous  
262 speculation implicated multicopper oxidases<sup>20,23,28</sup> or novel F<sub>420</sub>-dependent  
263 monooxygenases<sup>25</sup> in ammonia oxidation chemolithotrophy (specifically  
264 NH<sub>2</sub>OH oxidation) based on Cu redox chemistry or ortholog conservation  
265 across thaumarchaeal genomes. However, the genes put forth in those  
266 studies were not present in module 11 (referred to as the AMO module,  
267 herein), suggesting they may not be involved in core energy metabolism  
268 (Fig. 3, Supplementary Table 3). Moreover, we show that, on average, the  
269 AMO module is expressed at a higher level than other modules, and was  
270 more abundant in conditions where ammonia oxidation rates and  
271 thaumarchaeal abundances would be predicted to be high (Fig. 4). For  
272 example, consistent with previous reports of higher ammonia oxidation  
273 rates within hydrothermal plumes<sup>40</sup>, we show that the AMO module is  
274 expressed highly within the Guyamas Deep hydrothermal plume, relative to  
275 background samples (Fig. 4). Moreover, similar to reports of increased  
276 thaumarchaeal gene expression in the mesopelagic<sup>41</sup>, the AMO module is  
277 less abundant in the surface waters of Landsort Deep (0 and 5 m), relative  
278 to deeper waters (90 and 200 m) (Fig. 4).

279

280 **A new proposed model for thaumarchaeal chemolithotrophy via**  
281 **ammonia oxidation:** A previous model of thaumarchaeal ammonia  
282 oxidation proposed NO is derived from the reduction of  $\text{NO}_2^-$  by NirK, and  
283 that this NO is subsequently used to oxidize  $\text{NH}_2\text{OH}$ <sup>28</sup>. However, this model  
284 does not agree with tracer experiments using  $^{18}\text{O}$  labeled water, which  
285 show that only one O atom from water is incorporated into  $\text{NO}_2^-$  produced  
286 by thaumarchaea<sup>42,43</sup>. If  $\text{NO}_2^-$  was reduced to NO and used to produce  
287 additional  $\text{NO}_2^-$ , the resulting  $\text{NO}_2^-$  would retain an average of more than  
288 one O atom from water. Based on the co-expression data presented here,  
289 we propose two alternative models of thaumarchaeal ammonia oxidation  
290 that are consistent with previous isotope tracer data regarding the source of  
291 O atoms in  $\text{NO}_2^-$ . In both models, NirK and two membrane-anchored  
292 cupredoxins (T478\_1362 and T478\_0895) act in concert to oxidize  $\text{NH}_2\text{OH}$   
293 to  $\text{NO}_2^-$  in two steps: a three-electron oxidation of  $\text{NH}_2\text{OH}$  to NO, followed  
294 by a one-electron oxidation of NO to  $\text{NO}_2^-$  (Supplementary Figure 3). Both  
295 proposed pathways are consistent with the observed co-expression and  
296 high abundance of these transcripts across distinct environmental  
297 conditions (refs 1-4 and Figs 2-4). The predicted localization of ammonia  
298 oxidation in the pseudoperiplasm<sup>20</sup> is also a key aspect of the proposed  
299 models, as protein domain analysis with InterPro<sup>44</sup> indicates all proteins in  
300 these models, and pertinent cupredoxin domains, are likely localized in the  
301 pseudoperiplasmic space. While we cannot determine which reaction is  
302 conducted by which Cu metalloenzyme, both scenarios are more  
303 parsimonious than existing models and plausible based on existing  
304 bioinorganic chemistry literature.

305  
306 Surprisingly, two proteins coding for ferredoxin-type 4Fe-4S-domains (Fd1  
307 and Fd2) and an Fe-S cluster assembly protein were present in the AMO  
308 module, suggesting a central role for Fe-S cluster-containing proteins in the  
309 electron transport chain of thaumarchaea. Both Fd1 and Fd2 lack  
310 discernable signal sequences or PEFK domains, suggesting that they are  
311 localized in the cytoplasm. Ferredoxin-containing DNA binding  
312 transcriptional regulators have been implicated as NO sensors<sup>45</sup>. However,  
313 there are no predicted DNA-binding domains in Fd1 or Fd2. Sequence  
314 structure threading of Fd1 and Fd2 with phyre2<sup>46</sup> returned best structural  
315 matches to NADH dehydrogenase (ubiquinone) iron-sulfur protein 8  
316 (threading confidence score = 99.8% for both Fd1 and Fd2; coverage of  
317 Fd1 was 99% and 71% for Fd2). Thus, we speculate that Fd1 and Fd2  
318 participate in supplying electrons to the ubiquinone pool. This proposed



319 role suggests Fd1 and Fd2 may be involved in supplying the electrons  
320 necessary to initiate ammonia oxidation via Amo.

321  
322 Gene membership of the remaining significantly co-expressed modules did  
323 not reveal a clear pattern of how the genes contained within a given  
324 module are functionally related (Supplementary Table 3). In other words,  
325 except for the AMO module, the putative functions of genes contained  
326 within each module did not necessarily belong to the same metabolic  
327 pathways or cellular process. There are several reasons this might be the  
328 case. First, our methods likely underestimate the true modularity of *Ca. N.*  
329 *brevis* gene expression. Some of the larger expression modules may be  
330 composed of distinct modules that we could not resolve because we did not  
331 sample an environment with physicochemical parameters necessary to  
332 resolve subtle gene expression patterns. Second, although our goal was to  
333 be conservative in our network construction, we may be missing important  
334 network structural components because of the thresholding parameters or  
335 our analysis technique. Further resolution of such gene expression patterns  
336 would require deeply sequenced metatranscriptomes from additional  
337 distinct environments and transcriptome analysis of additional  
338 thaumarchaea grown under diverse culture conditions. Moreover, we do not  
339 yet understand why certain genes or pathways are co-expressed with one  
340 another, and how transcript abundances manifest into functional potential in  
341 each environment or culture setting.

## 342 343 **Conclusions:**

344 Metatranscriptome analyses often use ranked lists of genes or relative  
345 transcript abundances as a proxy for cellular activity and substrate  
346 utilization capacity, with the implicit assumption that relative transcript  
347 abundances are directly and universally related to these processes. Here  
348 we show the rank of most thaumarchaeal transcripts reported as being  
349 abundant in the environment (*amoABC*, both *amtB* genes and *nirK*, for  
350 example) are relatively rank invariant across growth phases and  
351 environmental conditions. However, consistent with other studies of  
352 thaumarchaeal transcription<sup>12</sup>, some of these genes were indeed  
353 significantly differentially abundant across paired treatments, showing  
354 ammonium availability did affect the abundances of ammonia oxidation and  
355 transport transcripts. One explanation for this observation is that although  
356 these transcripts are not 'constitutive' in a classic sense (that is, they are  
357 differentially abundant across paired experiments), they are instead

358 'affluent,' in that they make up a large part of the total transcript pool,  
359 irrespective of growth condition.

360

361 Discovering gene function in fastidious or uncultivated lineages remains  
362 one of the biggest challenges in environmental microbiology. Narrowing the  
363 scope of targets for detailed biochemical investigation is difficult because  
364 manipulative experiments are limited in their ability to identify networks of  
365 co-regulated genes by the number of environmental parameters we can  
366 recreate in a laboratory. The approach used here leverages a series of  
367 'natural experiments' - in which the environmental conditions are  
368 incompletely characterized - to identify genes that share similar  
369 transcription patterns. In addition to our putative models of ammonia  
370 oxidation in thaumarchaea, this approach shows that 4Fe-4S cluster-  
371 containing proteins likely have an important role in ammonia oxidation,  
372 indicating a role for iron in archaeal nitrification, which has been previously  
373 under appreciated. Detailed biochemical characterization of NirK, other  
374 cupredoxin-containing proteins, Fd1 and Fd2 is the next step in  
375 understanding their specific role in core thaumarchaeal energy metabolism.

376

#### 377 **Methods:**

378 *Organism sources and cultivation conditions:* '*Candidatus Nitrosopelagicus*  
379 *brevis*' str. CN25<sup>24</sup>, was propagated in ONP medium<sup>29</sup>, consisting of aged  
380 natural seawater (collected from 10 m depth at 15°S, 173°W on 23 October  
381 2011; 0.2 µm pore size filtered at sea) amended with a  
382 chemolithoautotrophic nitrogen source (NH<sub>4</sub>Cl or urea, described in  
383 'Experimental design'), ampicillin (10.8 µM), streptomycin (68.6 µM),  
384 potassium phosphate (29.4 µM), and a chelated trace metal mix consisting  
385 of disodium ethylenediaminetetraacetic acid (14 µM), FeCl<sub>2</sub> (7.25 µM),  
386 ZnCl<sub>2</sub> (0.5 µM), MnCl<sub>2</sub> (0.5 µM), H<sub>3</sub>BO<sub>3</sub> (1 µM), CoCl<sub>2</sub>·6H<sub>2</sub>O (0.8 µM),  
387 CuCl<sub>2</sub>·2H<sub>2</sub>O (0.1 µM), NiCl<sub>2</sub>·H<sub>2</sub>O (0.1 µM), Na<sub>2</sub>MoO<sub>4</sub>·2H<sub>2</sub>O (0.15 µM). '*Ca.*  
388 *N. brevis*' str. U25 was enriched from the original CN25 enrichment  
389 culture<sup>29</sup> using sequential transfers of the initial enrichment into ONP  
390 medium amended with 50-100 µM urea, instead of NH<sub>4</sub>Cl, over a period of  
391 ~48 months. All enrichments were propagated in 250 mL polycarbonate  
392 flasks at 22°C in the dark and monitored for NO<sub>2</sub><sup>-</sup> production using the  
393 Griess reagent colorimetric method<sup>47</sup>. Cell counts were obtained with a  
394 Millipore Guava EasyCyte 5HT flow cytometer as described previously<sup>48</sup>.

395

396 *Cell harvesting for and genome sequencing of 'Ca. N. brevis' str. U25:* A  
397 *Ca. N. brevis* U25 enrichment culture that was grown exclusively with urea

398 as the sole chemolithoautotrophic growth substrate for >50 generations,  
399 was harvested by filtration on to 25 mm diameter, 0.22  $\mu\text{m}$  pore-size Supor-  
400 200 filters and frozen at  $-80^{\circ}\text{C}$ . DNA was extracted using a DNeasy blood &  
401 Tissue DNA extraction kit (Qiagen, Valencia, CA, USA), following the  
402 manufacturer's instructions. The DNA was treated with RNase and  
403 examined using a Bioanalyzer 2100 (Agilent) with 500 ng serving as the  
404 input for library construction (NEBNext paired-end DNA Library Prep kit,  
405 New England Biolabs). The sample was sequenced on an Illumina MiSEQ  
406 (v2 chemistry, paired 150 bp reads). Reads were quality trimmed and  
407 served as the inputs to assembly with metaSPAdes (v 0.5, 70mer)<sup>49</sup>. The K-  
408 mer usage of and phylogenetic annotation of the assembled contigs were  
409 then used to visually identify a putative thaumarchaeal bin (Supplementary  
410 Figure 1a)<sup>50</sup>. The 3 contig genome was annotated using the JGI IMG  
411 pipeline and the PGAP pipeline at NCBI.

412  
413 *Experimental design, cell harvesting and RNA extraction for culture*  
414 *transcriptomes:* All cultures were grown in ONP medium prepared with  
415 aged surface seawater in acid-washed polycarbonate bottles as described  
416 above. For experiments investigating the effects of ammonia limitation,  
417 ONP medium was amended with 50  $\mu\text{M}$   $\text{NH}_4\text{Cl}$  as the  
418 chemolithoautotrophic growth substrate. In this experiment, six replicates  
419 were prepared, three of which were harvested in late exponential phase  
420 (Exponential phase) and three of which were harvested in late  $\text{NH}_4\text{Cl}$ -  
421 limited stationary phase (Stationary phase) (Supplementary Fig. 4). We  
422 deliberately harvested the exponential phase cultures in late exponential  
423 phase to ensure maximal cell biomass for transcriptome analysis.  $\text{NH}_4\text{Cl}$ -  
424 limitation was verified by demonstrating a linear the dose response in  
425 maximal cell density to  $\text{NH}_4\text{Cl}$  additions (Supplementary Fig. 5).

426  
427 Transcriptomes that were included in the network analysis were obtained  
428 from mid-exponential phase *Ca. N. brevis* strains CN25 and U25 that were  
429 growing on ONP medium amended with either 100  $\mu\text{M}$   $\text{NH}_4\text{Cl}$  (str. CN25;  
430  $n=3$ ) or 100  $\mu\text{M}$  urea (str. U25;  $n=3$ ) as growth substrates, respectively  
431 (Supplementary Fig. 6). Cells were harvested by filtration on to 25 mm  
432 diameter, 0.22  $\mu\text{m}$  pore-size Supor-200 filters and frozen at  $-80^{\circ}\text{C}$ . For RNA  
433 extraction, cells were disrupted as described in<sup>51</sup>. RNA was extracted using  
434 trizol-LS per the manufacturer's instructions and stored in nuclease free  
435 water at  $-80^{\circ}\text{C}$ . Urea consumption by str. U25 was determined  
436 colorimetrically using the diacetyl monoxime method<sup>52</sup> (Supplementary Fig.  
437 7).

438

439 *Transcriptome sequencing and mapping for culture experiments:*

440 Transcriptome samples were prepared for sequencing according the  
441 Epicenter TotalScript protocol, which biases against rRNA. Libraries were  
442 trial sequenced on an Illumina MiSEQ to determine uniformity between  
443 barcodes and then fully sequenced in one 300 cycle NextSEQ run which  
444 generated 246.6 million paired-end 150 base pair reads. Raw Illumina  
445 reads in fastq format are interleaved to match paired ends. Sequencing  
446 primers and barcode indexes were identified by BLAST against the NCBI  
447 vector database and trimmed along with regions with Q scores < 30. Reads  
448 mapping to ribosomal RNAs were identified and removed using ribopicker.  
449 Reads were mapped (clc\_ref\_assemble\_long -s 0.9, CLC genomics) to the  
450 *Ca. N. brevis* strains CN25 or U25 genome sequences. Raw read counts  
451 per open reading frame (ORF) were compiled.

452

453 *Analysis of differentially abundant gene transcripts:* Differential gene  
454 abundance analysis was performed using a generalized linear model  
455 likelihood ratio test in the edgeR software package (v 3.8.5)<sup>53</sup>. We defined  
456 significant differential abundance as those genes with a false discovery rate  
457 (FDR)  $\leq 0.01$  and greater than 2-fold abundance change across  
458 treatments.

459

460 *Rank Analyses:* Raw read counts per ORF were and scaled to expression  
461 units of reads per base per million reads mapped  
462 (RPKM= $(10^6 * C)/(NL/10^3)$ ) where C is the number of transcript reads  
463 mapped to an ORF; N is total reads mapped to all ORFs in the genome;  
464 and L is the ORF length in base pairs<sup>54</sup>. RPKM values were subsequently  
465 ranked with a rank of 1 depicting the most abundant transcript within a  
466 given treatment. Rank ties within a treatment were averaged.

467

468 *Metatranscriptome mapping to genomes of *Ca. N. brevis* strains:* Sequence  
469 reads from 68 metatranscriptomes were mapped to the *Ca. N. brevis*  
470 genomes at 50% nucleotide identity using CLC workbench (command:  
471 clc\_ref\_assemble -s 0.5) (Supplementary Table 4). The number of  
472 metatranscriptome reads that mapped to the *Ca. N. brevis* genomes were  
473 variable and ranged from 10 reads to 236,954 reads and mapped to 0.5-  
474 89% of the unique genes in the *Ca. N. brevis* genomes (Supplementary  
475 Table 4). Raw read counts per ORF were compiled (ORF n=1445 for str.  
476 CN25 and n=1461 for U25).

477

478 *Network construction:* Only those metatranscriptomes that mapped to  
479  $\geq 45\%$  of the ORFs in the *Ca. N. brevis* genomes, along with the  
480 transcriptomes from *Ca. N. brevis* strains CN25 and U25 growing in  
481 exponential phase initiated with 100  $\mu\text{M}$   $\text{NH}_4\text{Cl}$  or urea, respectively, were  
482 included for network analysis. Of the 68 metatranscriptomes mapped to the  
483 *Ca. N. brevis* genomes, only 10 passed this filtering step and were used for  
484 network analysis (Supplementary Table 4). Read counts were scaled to  
485 RPKM expression units. RPKM scores calculated for individual culture  
486 transcriptome replicates were averaged ( $n=3$ ) to avoid pseudo-replication  
487 effects in the network. The resulting RPKM expression values were rank-  
488 normalized to Van der Waerden (VdW) scores using the formula ( $s = \Phi^{-1}(r/(n+1))$ ),  
489 where  $s$  is the VdW score for a gene,  $r$  is the rank for that  
490 observation,  $n$  is the sample size and  $\Phi$  is the  $\Phi^{\text{th}}$  quantile from the  
491 standard normal distribution using *tRank* in the multic R package. Pearson  
492 correlation coefficients and  $P$  value estimates were calculated for all  
493 gene:gene pairs across the VdW-normalized metatranscriptomes and  
494 culture experiments ( $n=10$  and 2, respectively) with the *rcorr* command in  
495 the Hmisc R package<sup>55</sup>. To correct for multiple hypothesis testing,  $q$  values  
496 were computed from  $P$  value estimates using the *qvalue* R package<sup>56</sup>.  
497 Correlations with a  $q$  value  $\leq 0.025$  were used for network analysis. All  
498 correlations at this threshold were strongly correlated (Pearson's  $r \geq 0.8$ ).  
499

500 *Network Statistics:* Network modularity and module membership were  
501 calculated in Gephi (0.8.2 beta) with the following settings: resolution 1.0,  
502 randomized and unweighted<sup>57</sup>. Network was visualized using the  
503 Fruchterman Reingold algorithm in Gephi.  
504

#### 505 **Data Availability/Sources:**

506 Transcriptomes from *Ca. N. brevis* str. CN25 and U25 can be found in the  
507 NCBI BioSample archive under accession numbers SAMN6290440-  
508 6290457. The U25 genome has been deposited at DDBJ/ENA/GenBank  
509 under the accession LXWN00000000. The version described in this paper  
510 is version LXWN01000000. The metatranscriptomic data from Landsort  
511 Deep in the Baltic is available from the Sequence Read Archive under  
512 numbers SAMN04943349-SAMN04943415.

513 Other metatranscriptomes analyzed in the network are publically available  
514 through iMicrobe (<https://imicrobe.us>) or NCBI's Short Read Archive  
515 through the following accession numbers: CAM\_PROJ\_Sapelo2008,  
516 CAM\_PROJ\_AmazonRiverPlume, CAM\_PROJ\_PacificOcean,  
517 CAM\_P\_0000545, SRA023632.1.

518

519 **References:**

- 520 1. Hollibaugh, J. T., Gifford, S., Sharma, S., Bano, N. & Moran, M. A.  
521 Metatranscriptomic analysis of ammonia-oxidizing organisms in an  
522 estuarine bacterioplankton assemblage. *The ISME Journal* **5**, 866–  
523 878 (2011).
- 524 2. Baker, B. J., Lesniewski, R. A. & Dick, G. J. Genome-enabled  
525 transcriptomics reveals archaeal populations that drive nitrification in a  
526 deep-sea hydrothermal plume. *The ISME Journal* **6**, 2269–2279  
527 (2012).
- 528 3. Gifford, S. M., Sharma, S., Booth, M. & Moran, M. A. Expression  
529 patterns reveal niche diversification in a marine microbial assemblage.  
530 *The ISME Journal* **7**, 281–298 (2013).
- 531 4. Stewart, F. J., Ulloa, O. & DeLong, E. F. Microbial  
532 metatranscriptomics in a permanent marine oxygen minimum zone.  
533 *Environmental Microbiology* **14**, 23–40 (2012).
- 534 5. Karner, M. B., DeLong, E. F. & Karl, D. M. Archaeal dominance in the  
535 mesopelagic zone of the Pacific Ocean. *Nature* **409**, 507–510 (2001).
- 536 6. Schattener, M. *et al.* Latitudinal distribution of prokaryotic  
537 picoplankton populations in the Atlantic Ocean. *Environmental*  
538 *Microbiology* **11**, 2078–2093 (2009).
- 539 7. Francis, C. A., Roberts, K. J., Beman, J. M., Santoro, A. E. & Oakley,  
540 B. B. Ubiquity and diversity of ammonia-oxidizing archaea in water  
541 columns and sediments of the ocean. *Proc. Natl. Acad. Sci. U.S.A.*  
542 **102**, 14683–14688 (2005).
- 543 8. Coolen, M. J. L. *et al.* Putative ammonia-oxidizing Crenarchaeota in  
544 suboxic waters of the Black Sea: a basin-wide ecological study using  
545 16S ribosomal and functional genes and membrane lipids.  
546 *Environmental Microbiology* **9**, 1001–1016 (2007).
- 547 9. Lam, P. *et al.* Revising the nitrogen cycle in the Peruvian oxygen  
548 minimum zone. *Proc. Natl. Acad. Sci. U.S.A.* **106**, 4752–4757 (2009).
- 549 10. Pitcher, A. *et al.* Niche segregation of ammonia-oxidizing archaea and  
550 anammox bacteria in the Arabian Sea oxygen minimum zone. *The*  
551 *ISME Journal* **5**, 1896–1904 (2011).
- 552 11. Beman, J. M., Popp, B. N. & Alford, S. E. Quantification of ammonia  
553 oxidation rates and ammonia-oxidizing archaea and bacteria at high  
554 resolution in the Gulf of California and eastern tropical North Pacific  
555 Ocean. *Limnol. Oceanogr.* **57**, 711–726 (2012).
- 556 12. Nakagawa, T. & Stahl, D. A. Transcriptional response of the archaeal  
557 ammonia oxidizer *Nitrosopumilus maritimus* to low and

- 558 environmentally relevant ammonia concentrations. *Applied and*  
559 *Environmental Microbiology* **79**, 6911–6916 (2013).
- 560 13. Qin, W. *et al.* Marine ammonia-oxidizing archaeal isolates display  
561 obligate mixotrophy and wide ecotypic variation. *Proc. Natl. Acad. Sci.*  
562 *U.S.A.* **111**, 12504–12509 (2014).
- 563 14. Bayer, B. *et al.* Physiological and genomic characterization of two  
564 novel marine thaumarchaeal strains indicates niche differentiation.  
565 *The ISME Journal* **10**, 1051–1063 (2015).
- 566 15. Alonso-Sáez, L. *et al.* Role for urea in nitrification by polar marine  
567 Archaea. *Proc. Natl. Acad. Sci. U.S.A.* **109**, 17989–17994 (2012).
- 568 16. Tolar, B. B. *et al.* Contribution of ammonia oxidation to  
569 chemoautotrophy in Antarctic coastal waters. *The ISME Journal* **10**,  
570 2605–2619 (2016).
- 571 17. Pedneault, E., Galand, P. E., Potvin, M., Tremblay, J.-É. & Lovejoy, C.  
572 Archaeal *amoA* and *ureC* genes and their transcriptional activity in the  
573 Arctic Ocean. *Sci. Rep.* **4**, 1–11 (2014).
- 574 18. Shi, Y., Tyson, G. W., Eppley, J. M. & DeLong, E. F. Integrated  
575 metatranscriptomic and metagenomic analyses of stratified microbial  
576 assemblages in the open ocean. *The ISME Journal* **5**, 999–1013  
577 (2010).
- 578 19. Vajjala, N. *et al.* Hydroxylamine as an intermediate in ammonia  
579 oxidation by globally abundant marine archaea. *Proc. Natl. Acad. Sci.*  
580 *U.S.A.* **110**, 1006–1011 (2013).
- 581 20. Walker, C. B. *et al.* *Nitrosopumilus maritimus* genome reveals unique  
582 mechanisms for nitrification and autotrophy in globally distributed  
583 marine crenarchaea. *Proc. Natl. Acad. Sci. U.S.A.* **107**, 8818–8823  
584 (2010).
- 585 21. Arp, D. J., Chain, P. S. G. & Klotz, M. G. The impact of genome  
586 analyses on our understanding of ammonia-oxidizing bacteria. *Annu.*  
587 *Rev. Microbiol.* **61**, 503–528 (2007).
- 588 22. Hallam, S. J. *et al.* Genomic analysis of the uncultivated marine  
589 crenarchaeote *Cenarchaeum symbiosum*. *Proc. Natl. Acad. Sci.*  
590 *U.S.A.* **103**, 18296–18301 (2006).
- 591 23. Stahl, D. A. & la Torre, de, J. R. Physiology and diversity of ammonia-  
592 oxidizing archaea. *Annu. Rev. Microbiol.* **66**, 83–101 (2012).
- 593 24. Santoro, A. E. *et al.* Genomic and proteomic characterization of  
594 ‘*Candidatus Nitrosopelagicus brevis*’: an ammonia-oxidizing archaeon  
595 from the open ocean. *Proc. Natl. Acad. Sci. U.S.A.* **112**, 1173–1178  
596 (2015).
- 597 25. Kerou, M. *et al.* Proteomics and comparative genomics of

- 598 *Nitrososphaera viennensis* reveal the core genome and adaptations of  
599 archaeal ammonia oxidizers. *Proc. Natl. Acad. Sci. U.S.A.*  
600 201601212–19 (2016). doi:10.1073/pnas.1601212113
- 601 26. Martens-Habben, W. *et al.* The production of nitric oxide by marine  
602 ammonia-oxidizing archaea and inhibition of archaeal ammonia  
603 oxidation by a nitric oxide scavenger. *Environmental Microbiology* **17**,  
604 2261–2274 (2015).
- 605 27. Stieglmeier, M. *et al.* Aerobic nitrous oxide production through N-  
606 nitrosating hybrid formation in ammonia-oxidizing archaea. *The ISME*  
607 *Journal* **8**, 1135–1146 (2014).
- 608 28. Kozlowski, J. A., Stieglmeier, M., Schleper, C., Klotz, M. G. & Stein, L.  
609 Y. Pathways and key intermediates required for obligate aerobic  
610 ammonia-dependent chemolithotrophy in bacteria and  
611 Thaumarchaeota. *The ISME Journal* **10**, 1836–1845 (2016).
- 612 29. Santoro, A. E. & Casciotti, K. L. Enrichment and characterization of  
613 ammonia-oxidizing archaea from the open ocean: phylogeny,  
614 physiology and stable isotope fractionation. *The ISME Journal* **5**,  
615 1796–1808 (2011).
- 616 30. Tolar, B. B., Wallsgrave, N. J., Popp, B. N. & Hollibaugh, J. T.  
617 Oxidation of urea-derived nitrogen by thaumarchaeota-dominated  
618 marine nitrifying communities. *Environmental Microbiology* (2016).  
619 doi:10.1111/1462-2920.13457
- 620 31. Smith, J. M., Casciotti, K. L., Chavez, F. P. & Francis, C. A.  
621 Differential contributions of archaeal ammonia oxidizer ecotypes to  
622 nitrification in coastal surface waters. *The ISME Journal* **8**, 1704–1714  
623 (2014).
- 624 32. Li, D.-C., Yang, F., Lu, B., Chen, D.-F. & Yang, W.-J.  
625 Thermotolerance and molecular chaperone function of the small heat  
626 shock protein HSP20 from hyperthermophilic archaeon, *Sulfolobus*  
627 *solfataricus* P2. *Cell Stress and Chaperones* **17**, 103–108 (2011).
- 628 33. Wei, X. *et al.* Transcript profiles of *Nitrosomonas europaea* during  
629 growth and upon deprivation of ammonia and carbonate. *FEMS*  
630 *Microbiology Letters* **257**, 76–83 (2006).
- 631 34. Berube, P. M. & Stahl, D. A. The divergent AmoC3 subunit of  
632 ammonia monooxygenase functions as part of a stress response  
633 system in *Nitrosomonas europaea*. *Journal of Bacteriology* **194**,  
634 3448–3456 (2012).
- 635 35. Smith, D. P. *et al.* Proteomic and transcriptomic analyses of  
636 ‘*Candidatus Pelagibacter ubique*’ describe the first PII-independent  
637 response to nitrogen limitation in a free-living Alphaproteobacterium.



- 638 *mBio* **4**, e00133–12 (2013).
- 639 36. Giovannoni, S. J., Cameron Thrash, J. & Temperton, B. Implications  
640 of streamlining theory for microbial ecology. *The ISME Journal* **8**,  
641 1553–1565 (2014).
- 642 37. Cottrell, M. T. & Kirchman, D. L. Transcriptional control in marine  
643 copiotrophic and oligotrophic bacteria with streamlined genomes.  
644 *Applied and Environmental Microbiology* **82**, 6010–6018 (2016).
- 645 38. Lindås, A.-C., Karlsson, E. A., Lindgren, M. T., Ettema, T. J. G. &  
646 Bernander, R. A unique cell division machinery in the Archaea. *Proc.*  
647 *Natl. Acad. Sci. U.S.A.* **105**, 18942–18946 (2008).
- 648 39. Spang, A. *et al.* Complex archaea that bridge the gap between  
649 prokaryotes and eukaryotes. *Nature* **521**, 173–179 (2015).
- 650 40. Lam, P., Cowen, J. P. & Jones, R. D. Autotrophic ammonia oxidation  
651 in a deep-sea hydrothermal plume. *FEMS Microbiology Ecology* **47**,  
652 191–206 (2004).
- 653 41. Church, M. J., Wai, B., Karl, D. M. & DeLong, E. F. Abundances of  
654 crenarchaeal *amoA* genes and transcripts in the Pacific Ocean.  
655 *Environmental Microbiology* **12**, 679–688 (2010).
- 656 42. Santoro, A. E., Buchwald, C., McIlvin, M. R. & Casciotti, K. L. Isotopic  
657 signature of N<sub>2</sub>O produced by marine ammonia-oxidizing archaea.  
658 *Science* **333**, 1282–1285 (2011).
- 659 43. Buchwald, C., Santoro, A. E., McIlvin, M. R. & Casciotti, K. L. Oxygen  
660 isotopic composition of nitrate and nitrite produced by nitrifying  
661 cocultures and natural marine assemblages. *Limnol. Oceanogr.* **57**,  
662 1361–1375 (2012).
- 663 44. Jones, P. *et al.* InterProScan 5: genome-scale protein function  
664 classification. *Bioinformatics* **30**, 1236–1240 (2014).
- 665 45. Kiley, P. J. & Beinert, H. The role of Fe–S proteins in sensing and  
666 regulation in bacteria. *Current Opinion in Microbiology* **6**, 181–185  
667 (2003).
- 668 46. Kelley, L. A., Mezulis, S., Yates, C. M., Wass, M. N. & Sternberg, M.  
669 J. E. The Phyre2 web portal for protein modeling, prediction and  
670 analysis. *Nat Protoc* **10**, 845–858 (2015).
- 671 47. Strickland, J. D. H. & Parsons, T. R. *A Practical Handbook of*  
672 *Seawater Analysis. 2.ed.* (1972).
- 673 48. Tripp, H. J. Counting marine microbes with Guava Easy-Cyte 96 well  
674 plate reading flow cytometer. *Protocol Exchange* (2008).  
675 doi:10.1038/nprot.2008.29
- 676 49. Nurk, S., Meleshko, D., Korobeynikov, A. & Pevzner, P. A.  
677 metaSPAdes: a new versatile metagenomic assembler. *Genome*

- 678            *Research* **27**, 824–834 (2017).
- 679    50.    Laczny, C. C. *et al.* VizBin - an application for reference-independent  
680            visualization and human-augmented binning of metagenomic data.  
681            *Microbiome* **3**, 1–7 (2015).
- 682    51.    Santoro, A. E., Casciotti, K. L. & Francis, C. A. Activity, abundance  
683            and diversity of nitrifying archaea and bacteria in the central California  
684            Current. *Environmental Microbiology* **12**, 1989–2006 (2010).
- 685    52.    Price, N. M. & Harrison, P. J. Comparison of methods for the analysis  
686            of dissolved urea in seawater. *Marine Biology* **94**, 307–317 (1987).
- 687    53.    Robinson, M. D. & Smyth, G. K. Small-sample estimation of negative  
688            binomial dispersion, with applications to SAGE data. *Biostatistics* **9**,  
689            321–332 (2008).
- 690    54.    Mortazavi, A., Williams, B. A., McCue, K., Schaeffer, L. & Wold, B.  
691            Mapping and quantifying mammalian transcriptomes by RNA-Seq. *Nat*  
692            *Meth* **5**, 621–628 (2008).
- 693    55.    Harrell, F. E., Jr & Dupont, C. Hmisc: Harrell Miscellaneous.
- 694    56.    Storey, J. D. & Tibshirani, R. Statistical significance for genomewide  
695            studies. *Proc. Natl. Acad. Sci. U.S.A.* **100**, 9440–9445 (2003).
- 696    57.    Blondel, V. D., Guillaume, J.-L., Lambiotte, R. & Lefebvre, E. Fast  
697            unfolding of communities in large networks. *Journal of Statistical*  
698            *Mechanics: Theory and Experiment* **10**, 10008– (2008).
- 699    58.    Goris, J. *et al.* DNA-DNA hybridization values and their relationship to  
700            whole-genome sequence similarities. *Int. J. Syst. Evol. Microbiol.* **57**,  
701            81–91 (2007).
- 702    59.    Hosseinzadeh, P. *et al.* A purple cupredoxin from *Nitrosopumilus*  
703            *maritimus* containing a mononuclear type 1 copper center with an  
704            open binding site. *J. Am. Chem. Soc.* **138**, 6324–6327 (2016).
- 705    60.    Ritchie, G. & Nicholas, D. Identification of the sources of nitrous oxide  
706            produced by oxidative and reductive processes in *Nitrosomonas*  
707            *europaea*. *Biochem. J.* (1972).
- 708    61.    Ritchie, G. A. & Nicholas, D. J. The partial characterization of purified  
709            nitrite reductase and hydroxylamine oxidase from *Nitrosomonas*  
710            *europaea*. *Biochem. J.* **138**, 471–480 (1974).
- 711    62.    Wijma, H. J., Canters, G. W., de Vries, S. & Verbeet, M. P.  
712            Bidirectional catalysis by copper-containing nitrite reductase.  
713            *Biochemistry* **43**, 10467–10474 (2004).
- 714    63.    Caranto, J. D. & Lancaster, K. M. Nitric oxide is an obligate bacterial  
715            nitrification intermediate produced by hydroxylamine oxidoreductase.  
716            *Proc. Natl. Acad. Sci. U.S.A.* **Vol 16**, 201704504–13 (2017).
- 717

718

719

720 **Figures:**

721

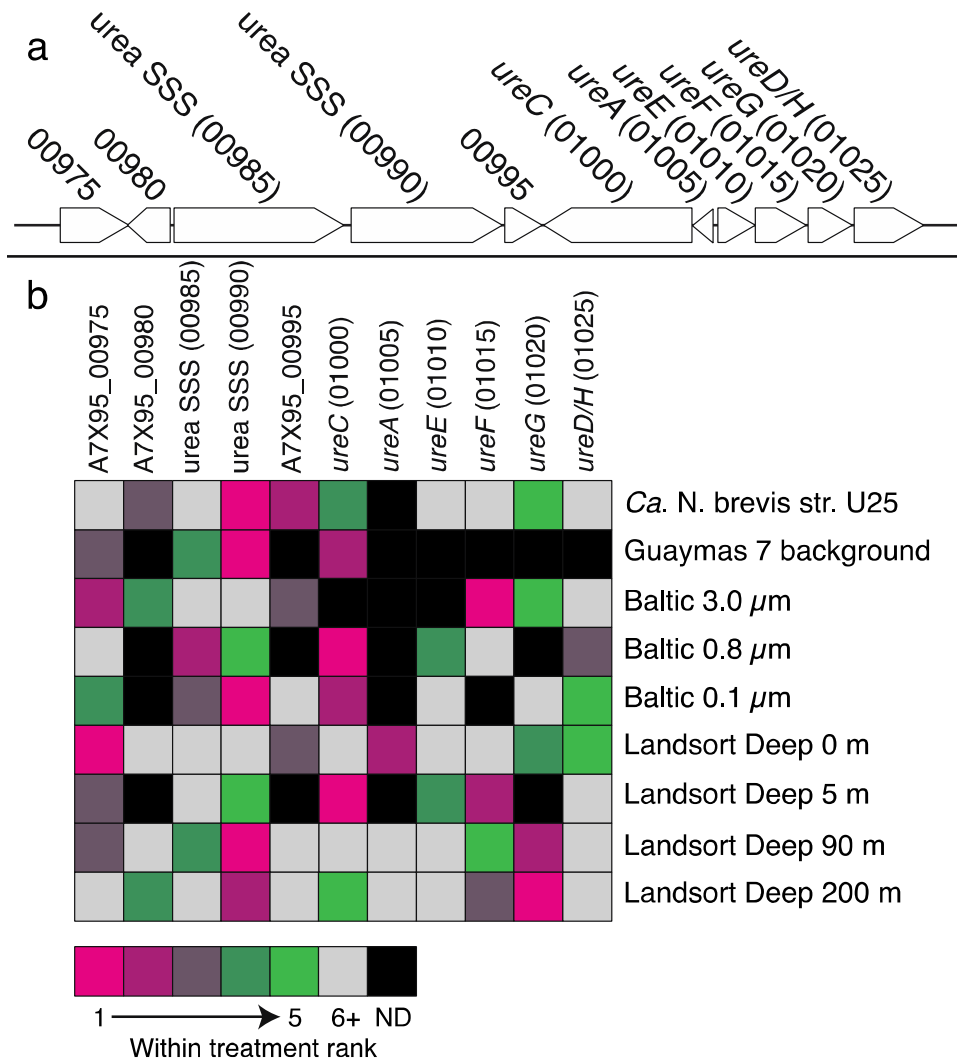

722

723 **Figure 1:** Urea transport and catalysis genes are frequently the most highly  
 724 expressed *Ca. N. brevis* U25-specific genes. (a) Chromosomal orientation  
 725 of the *Ca. N. brevis* str. U25 indel conferring urea transport and catalysis  
 726 capability. (b) Heatmap illustrating the relative rank expression level of the  
 727 5 most abundant genes in the urea indel region for culture experiments and  
 728 environmental metatranscriptomes. Rank was calculated within a given  
 729 treatment from RPKM normalized expression values, where a rank of 1 is  
 730 the most abundant transcript. The mean expression (n=3 replicates) value  
 731 was used for ranking the culture treatment. ND=Not detected. Some  
 732 metatranscriptomes were excluded because they did not have sufficient  
 733 coverage of the urea transport and catabolism machinery. Numbers in  
 734 parentheses after gene names refer to A7X95 locus tags.

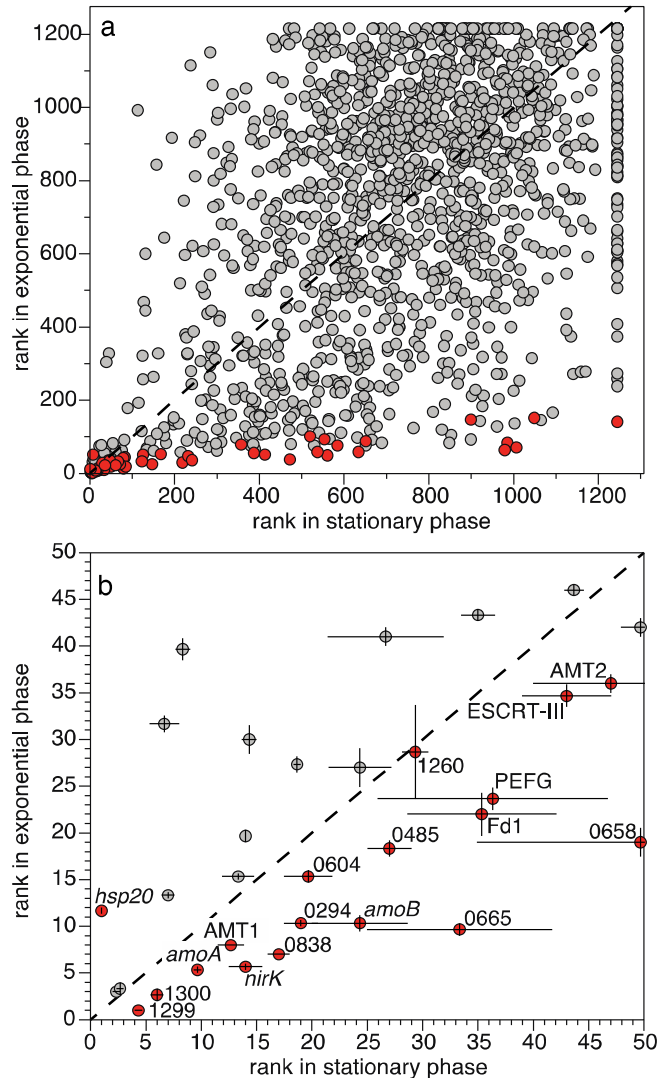

735  
736 **Figure 2:** Highly expressed *Ca. N. brevis* str. CN25 gene transcripts in  
737 exponential phase are also highly expressed in stationary phase, despite  
738 significant differences in abundance. (a) Points are the mean rank ( $n=3$ ) of  
739 RPKM normalized expression values for all genes in exponential and  
740 stationary growth phases. Red colored genes were significantly  
741 differentially transcribed across treatments (Supplementary Table 2). The  
742 abundances of grey points were not significantly different across  
743 treatments. Dashed line is 1:1 line indicating no change in rank. (b) Subset  
744 of panel (a), illustrating the rank of transcripts that are in the top 50 most  
745 abundant transcripts in both exponential and stationary phase. Points in (b)  
746 are the mean rank and error bars represent  $\pm$  SE ( $n=3$ ). Gene transcript  
747 abundances in (b) that were significantly different across treatments are  
748 labeled and colored red. The 'T478\_' prefix is omitted from labels of genes  
749 annotated as 'hypothetical'. PEFG corresponds to T478\_0596.

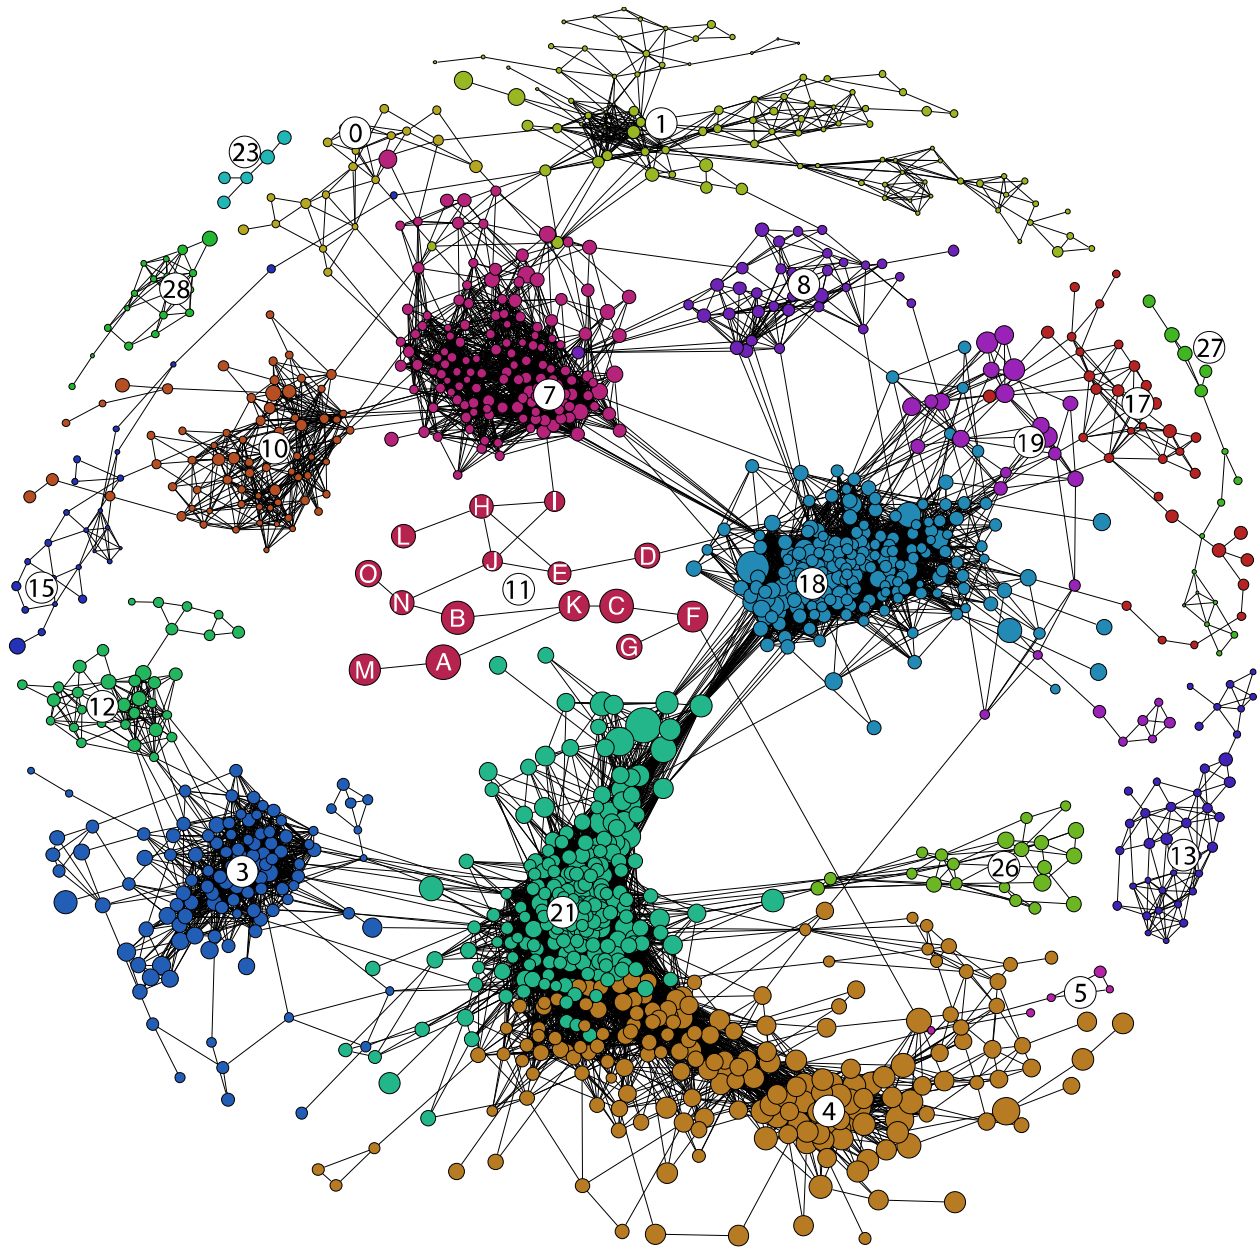

### Module 11 (AMO module) membership details

|                                     |                                         |
|-------------------------------------|-----------------------------------------|
| A: <i>amoA</i> (0302)               | I: ESCRT-III (0057)                     |
| B: <i>amoB</i> (0298)               | J: PEFG-CTERM (0270)                    |
| C: <i>amoC</i> (0300)               | K: <i>nirK</i> (1026)                   |
| D: Membrane-bound cupredoxin (0895) | L: <i>amoX</i> (0301)                   |
| E: 0487                             | M: AMT1 (1378)                          |
| F: Fd1 (1472)                       | N: Cupredoxin PEFG-CTERM (1362)         |
| G: Fd2 (1259)                       | O: Fe-S cluster assembly protien (1056) |
| H: 1317                             |                                         |

750

751

752

753

754

**Figure 3:** Thaumarchaeal gene expression is highly modular and ammonia oxidation genes are co-expressed. Network diagram of strong and significant (Pearson's  $r \geq 0.8$ ,  $q$  value  $\leq 0.025$ ) positive correlations across ten environmental metatranscriptomes and two transcriptomes from

755 laboratory cultures (12 conditions total). Individual nodes are genes. Nodes  
756 are sized by the mean normalized rank abundance (VdW scores), whereby  
757 larger nodes are more abundant transcripts. Nodes are colored by module  
758 membership. Circled numbers are the module identity (Supplementary  
759 Table 3). The module 11 (the AMO module) genes are identified by letters  
760 A-O; their annotations are provided below network. Numbers in  
761 parentheses refer to T478 locus tags. Only modules with five or more  
762 nodes are shown for clarity; see Supplementary Table 3 for all module  
763 membership.  
764

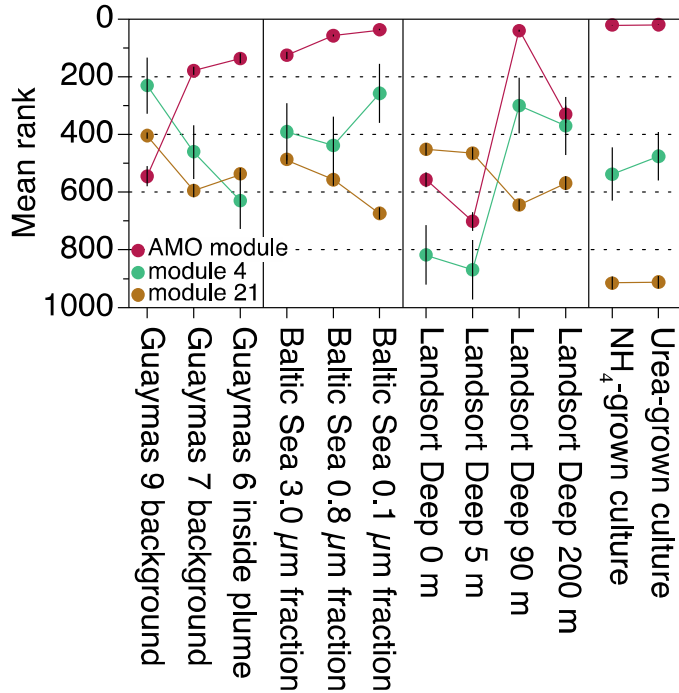

765  
766  
767  
768  
769  
770  
771  
772  
773

**Fig. 4:** Natural variability in the mean rank of expression modules across environments and culture conditions. Points are the average rank of all genes contained within a given module at each site; error bars are  $\pm$  SE. On average, the AMO module and modules 36, 4 and 21 rank the highest (that is, they are the most abundant) across all sites. Module 36 is not displayed because it is only comprised of two genes, which prevents statistical analysis, and these genes are absent in the U25 genome.



774  
775  
776  
777  
778  
779  
780

# Supplemental Information for: Correlated expression of archaeal ammonia oxidation machinery across disparate environmental and culture conditions

Paul Carini<sup>1,3</sup>, Christopher L. Dupont<sup>2</sup>, Alyson E. Santoro<sup>1,4</sup>

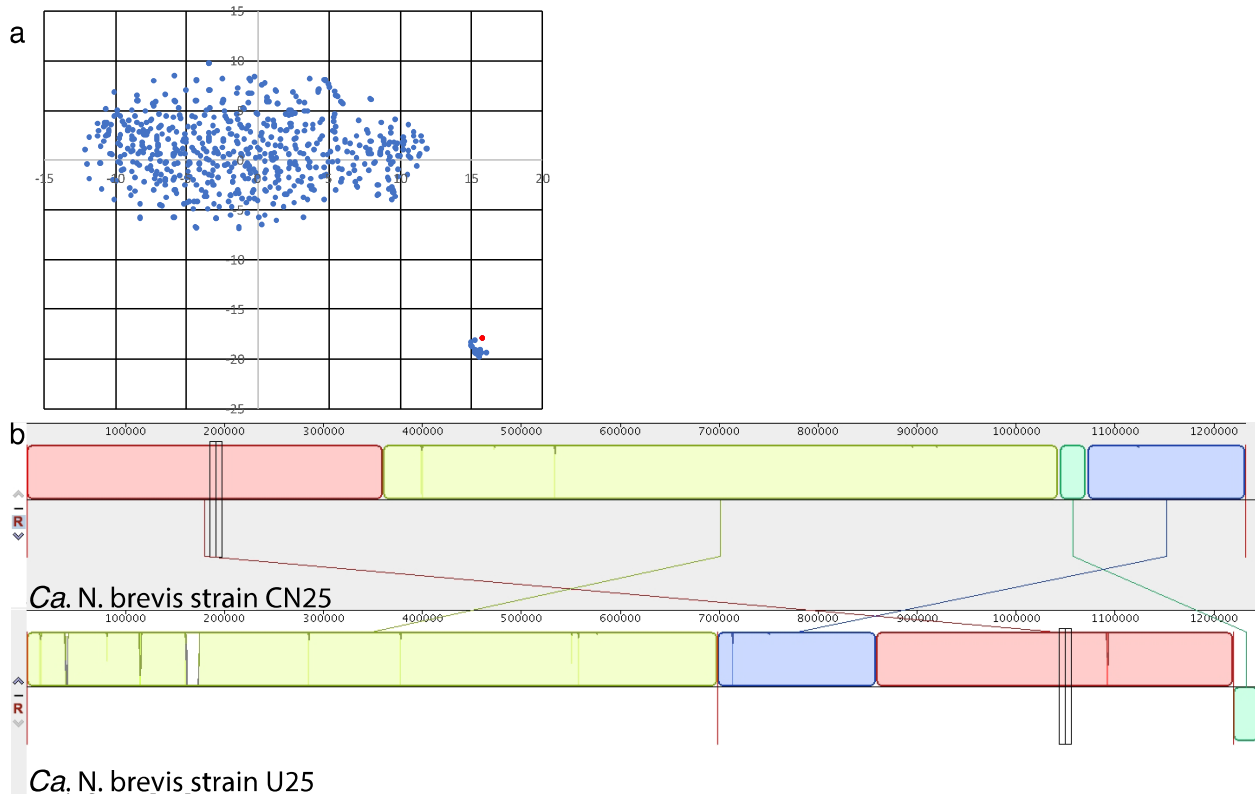

781  
782  
783  
784  
785  
786  
787  
788  
789  
790  
791  
792

**Supplementary Figure 1:** *Ca. N. brevis* str. U25 metagenome binning and alignment to strain *Ca. N. brevis* str. CN25. (a) Vizbin analysis of 5 mer utilization of the assembly from a thaumarchaea enrichment culture maintained on urea. Contigs containing any thaumarchaea predicted genes are in red and code for the *Ca. N. brevis* str. U25 genome. (b) Mauve alignment of *Ca. N. brevis* strains CN25 (top) and U25 (bottom). The genomes are syntenic with only a few indels between the two strains (listed in Supplementary Table 1) (illustrated as white vertical bands). Red vertical lines in the U25 genome in (b) are contig breaks.

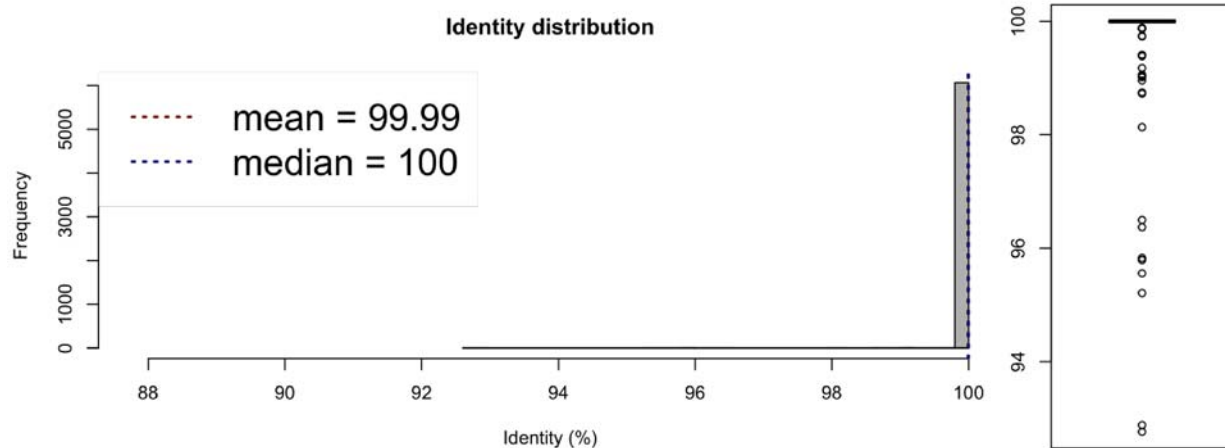

793  
794  
795  
796  
797  
798  
799

**Supplementary Figure 2:** Simulated DNA-DNA hybridization analysis for the CN25 and U25 genomes using the methods of ref<sup>58</sup>. The mean nucleotide identity of 99.99% is for a two-way average nucleotide identity analysis. The most divergent conserved genomic segment is 92% nucleotide identity.

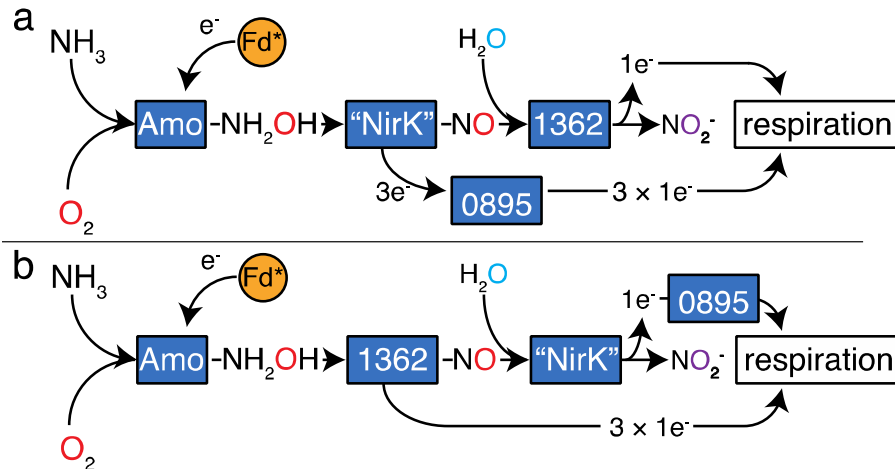

800

801 **Supplementary Figure 3:** Proposed ammonia ( $\text{NH}_3$ ) oxidation pathways  
 802 for thaumarchaea based on co-expression of pseudoperiplasmic-localized  
 803 Cu metalloenzymes. Amo, T478\_1362, Fd1, Fd2, “NirK” and T478\_0895  
 804 are co-expressed in a conserved module (the AMO module) across  
 805 different environments as illustrated in Fig. 3 in the main text. In these  
 806 models, a membrane-anchored PEFG-CTERM domain-containing Cu  
 807 metalloenzyme (T478\_1362) acts in concert with “NirK” and T478\_0895 to  
 808 catalyze a two-step reaction: the 3-electron oxidation of hydroxylamine  
 809 ( $\text{NH}_2\text{OH}$ ) to nitric oxide (NO) followed by the one-electron oxidation of NO  
 810 to  $\text{NO}_2^-$ . In (a) “NirK” acts as the hydroxylamine oxidase. The model  
 811 proposed in (a) is supported by sequence structure threading of  
 812 T478\_1362, which predicts the cupredoxin domain has an open  
 813 configuration, as in a recently characterized purple cupredoxin from *N.*  
 814 *maritimus* that oxidizes NO to  $\text{NO}_2^-$ <sup>59</sup>. Additionally, the model in (a) is  
 815 consistent with the potential for NirK to carry three electrons by way of  
 816 three Cu atoms<sup>20</sup>; and the potential for  $\text{NH}_2\text{OH}$  to be oxidized to NO by an  
 817 uncharacterized nitrite reductase<sup>60,61</sup>. In the model depicted in (b),  
 818 T478\_1362 acts as the hydroxylamine oxidase. Model (b) is consistent with  
 819 the ability of purified bacterial NirK to favor the formation of  $\text{NO}_2^-$  from NO  
 820 and water at biological pH<sup>62</sup>. Moreover, NirK may catalyze the final step in a  
 821 three-step ammonia oxidation pathway in ammonia-oxidizing bacteria  
 822 (AOB)<sup>63</sup>. In both model (a) and (b), electrons are putatively shuttled from  
 823 NirK to respiratory complexes by membrane-anchored cupredoxin-  
 824 containing T478\_0895. Two ferredoxins ( $\text{Fd}^* = \text{Fd1}$  and  $\text{Fd2}$ ) were also co-  
 825 expressed with the core ammonia oxidation machinery. These ferredoxins  
 826 are predicted to be cytoplasmic and may play a role in supplying the  
 827 electrons required for the initial oxidation of  $\text{NH}_3$  to  $\text{NH}_2\text{OH}$  by Amo (see  
 828 main text). Enzyme complexes colored blue are Cu metalloenzymes.

829 Enzymes colored orange are iron-containing. Color of the oxygen atom  
830 depicts the source: red = molecular oxygen; Cyan=water; purple=one atom  
831 from oxygen and one atom from water. Numbers are locus tags with  
832 'T478\_' omitted.  
833

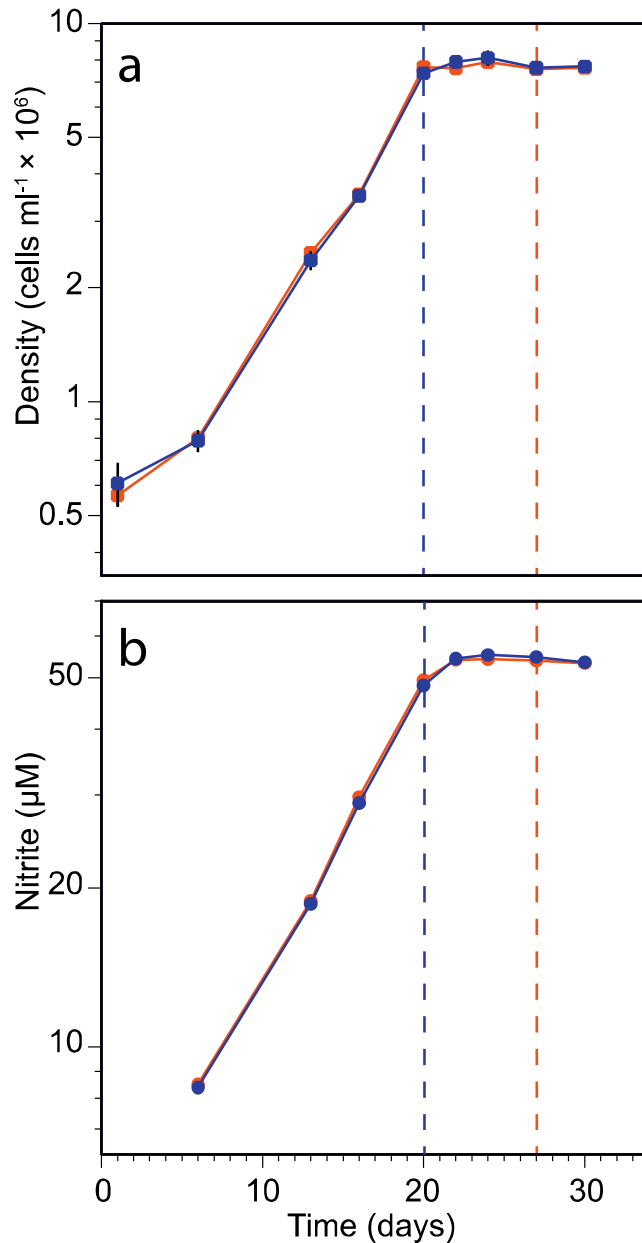

834  
835  
836  
837  
838  
839  
840  
841  
842  
843

**Supplementary Fig. 4:** *Ca. N. brevis* CN25 growth curves illustrating the average cell density (a) and NO<sub>2</sub><sup>-</sup> concentration (b) for cultures harvested for transcriptomes used to investigate the effects of ammonia limitation. Dashed vertical lines are sample time points for exponential phase (blue line) and ammonium-limited stationary phase (orange line). Points are the mean of biological triplicates ± SD. When error bars are not visible, they are smaller than the size of the symbols. Cells were grown in ONP medium<sup>29</sup> with 50 μM NH<sub>4</sub>Cl, as described in materials and methods.

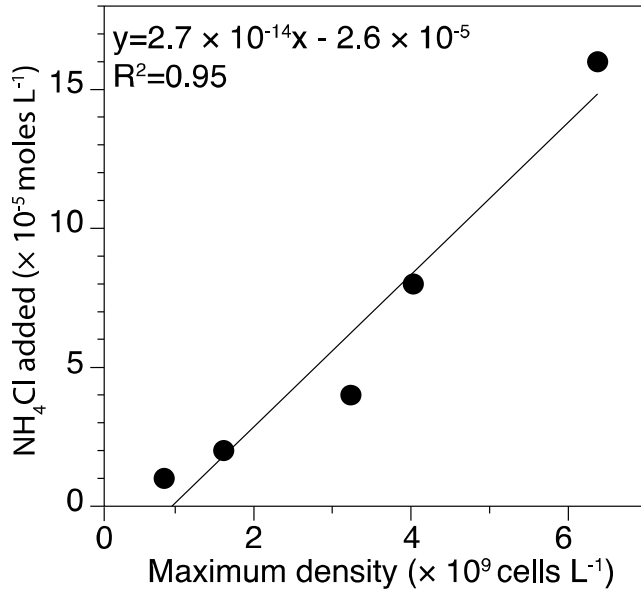

844  
845  
846  
847  
848  
849  
850  
851

**Supplementary Fig. 5:** *Ca. N. brevis* CN25 molar growth yield in response to ammonium ( $NH_4^+$ ) additions, illustrating that  $NH_4^+$  was limiting growth in the transcriptome experiments. Points are the maximum density achieved by *Ca. N. brevis* str. CN25 as a function of  $NH_4Cl$  additions. Linear regression through all five points is shown, with equation and  $R^2$ . Cells were grown in ONP medium<sup>29</sup> as described in materials and methods.

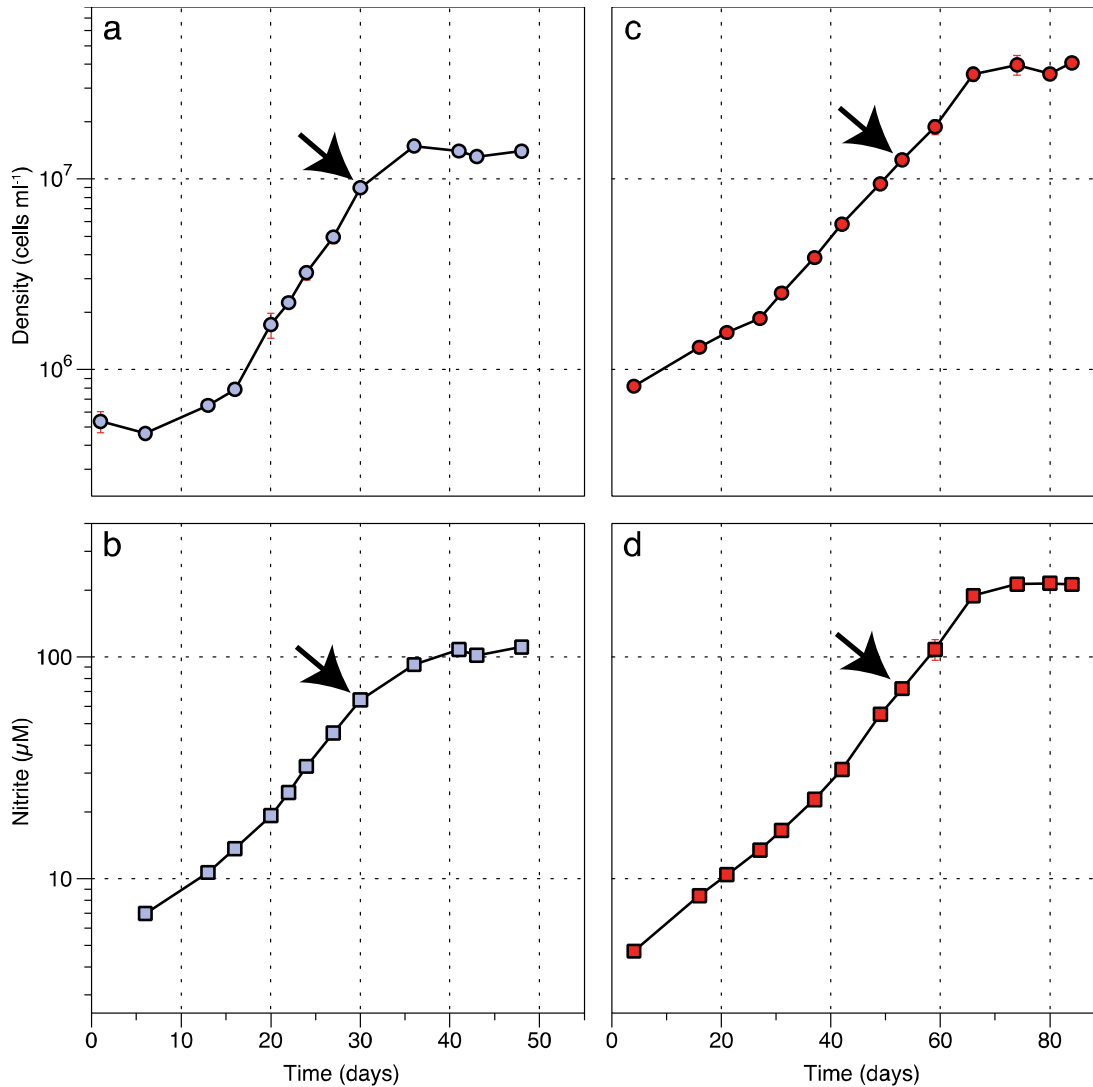

852

853

854

855 **Supplementary Fig. 6:** *Ca. N. brevis* CN25 (a,b) and U25 (c,d) growth

856 curves illustrating the average cell density (a,c) and NO<sub>2</sub><sup>-</sup> concentration

857 (b,d) for cultures harvested for transcriptomes. Arrowheads indicate the cell

858 density and nitrite concentration at the time of sampling. Points are the

859 mean of biological triplicates ± SD. When error bars are not visible, they

860 are smaller than the size of the symbols. Cells were grown in ONP

861 medium<sup>29</sup> with 100 μM NH<sub>4</sub>Cl (a,b) or 100 μM urea (c,d), as described in

862 materials and methods.

862

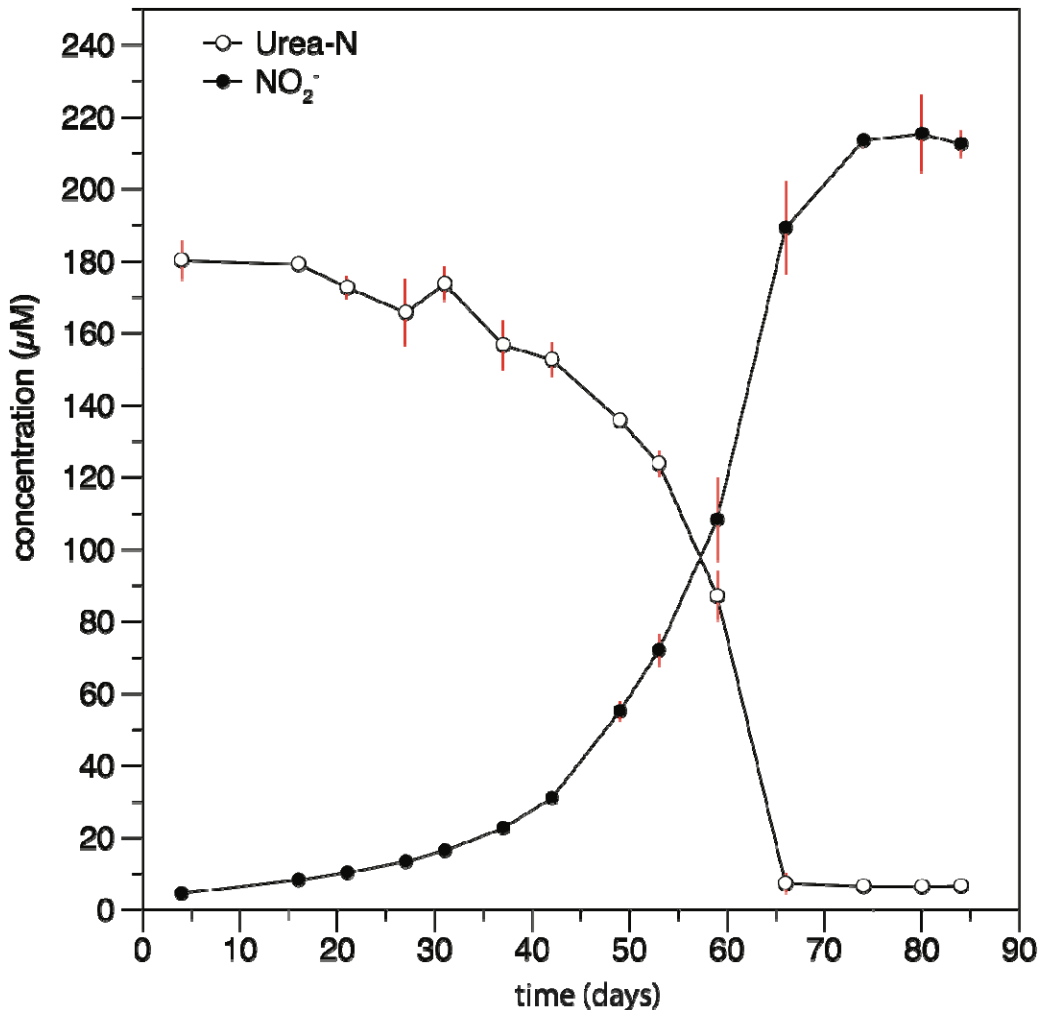

863  
864  
865  
866  
867  
868  
869

**Supplementary Figure 7:** *Ca. N. brevis* strain U25 oxidizes urea-N to NO<sub>2</sub><sup>-</sup>. Points are the average ± SD (error bars) concentration of urea-N (open circles) and NO<sub>2</sub><sup>-</sup> (filled circles) of triplicate *Ca. N. brevis* str. U25 cultures. Cells were grown in ONP medium<sup>29</sup> with 100 μM urea, as described in materials and methods.

870  
871

### Acknowledgements:

872  
873  
874  
875  
876

This research was supported by NSF awards OCE-1260006, OCE-1437310, and DBI-1318455 to AES. CLD was supported by NSF OCE-1259994. We thank Matt Rawls for urea measurements, Mike Stukel for obtaining oligotrophic seawater, and Albert Barberán and Jason Corwin for discussions regarding network construction.
