1 **Patterns of thaumarchaeal gene expression in culture and diverse**  
2 **marine environments**

3  
4 **Authors:**

5 Paul Carini<sup>1,3</sup>, Christopher L. Dupont<sup>2</sup>, Alyson E. Santoro<sup>1,4</sup>

6  
7 <sup>1</sup>Horn Point Laboratory, University of Maryland Center for Environmental  
8 Science, Cambridge, MD 21613

9 <sup>2</sup>J. Craig Venter Institute, San Diego, CA 92037

10 <sup>3</sup>Present Address: Department of Soil, Water and Environmental Science,  
11 University of Arizona, Tucson, AZ 85721

12 <sup>4</sup>Present address: Department of Ecology, Evolution, and Marine Biology,  
13 University of California, Santa Barbara, CA 93106

14  
15 **Keywords:** Thaumarchaea, nitrification, metatranscriptome, NirK, nitrogen  
16 cycling

17  
18 **Corresponding Author:** Alyson Santoro ([alyson.santoro@lifesci.ucsb.edu](mailto:alyson.santoro@lifesci.ucsb.edu))

19  
20 **Abstract**  
21 Thaumarchaea are ubiquitous in marine habitats where they participate in  
22 carbon and nitrogen cycling. Although metatranscriptomes suggest  
23 thaumarchaea are active microbes in marine waters, we understand little  
24 about how thaumarchaeal gene expression patterns relate to substrate  
25 utilization and activity. Here, we report the global transcriptional response  
26 of the marine ammonia-oxidizing thaumarchaeon '*Candidatus*  
27 *Nitrosopelagicus brevis*' str. CN25 to ammonia limitation using RNA-Seq.  
28 We further describe the genome and transcriptome of *Ca. N. brevis* str.  
29 U25, a new strain capable of urea utilization. Ammonia limitation in CN25  
30 resulted in reduced expression of transcripts coding for ammonia oxidation  
31 proteins, and increased expression of a gene coding an Hsp20-like  
32 chaperone. Despite significantly different transcript abundances across  
33 treatments, two ammonia monooxygenase subunits (*amoAB*), a nitrite  
34 reductase (*nirK*), and both ammonium transporter genes were always  
35 among the most abundant transcripts, regardless of growth state. *Ca. N.*  
36 *brevis* str. U25 cells expressed a urea transporter 139-fold more than the  
37 urease catalytic subunit *ureC*. Gene co-expression networks derived from  
38 culture transcriptomes and ten thaumarchaea-enriched metatranscriptomes

39 revealed a high degree of correlated gene expression across disparate  
40 environmental conditions and identified a module of genes, including  
41 *amoABC* and *nirK*, that we hypothesize to represent the core ammonia  
42 oxidation machinery.

43

#### 44 **Originality-Significance Statement:**

45 Discovering gene function in fastidious or uncultivated lineages remains  
46 one of the biggest challenges in environmental microbiology. Here, we use  
47 an approach that combines controlled laboratory experiments with *in situ*  
48 transcript abundance data from the environment to identify genes that  
49 share similar transcription patterns in marine ammonia-oxidizing  
50 thaumarchaea. These findings demonstrate how transcriptomes from  
51 microbial cultures can be used together with complex environmental  
52 samples to identify suites of co-expressed genes that are otherwise  
53 enigmatic and provide new insights into the mechanism of ammonia  
54 oxidation. Our results add to the growing body of literature showing that  
55 relatively small changes in transcript abundance are linked to large  
56 changes in growth in organisms with reduced genomes, suggesting they  
57 have limited capacity for metabolic regulation or that they rely on  
58 mechanisms other than transcriptional regulation to deal with a fluctuating  
59 environment.

60

#### 61 **Introduction:**

62 Ammonia-oxidizing thaumarchaea are ubiquitous and abundant in the  
63 oceans, accounting for >30% of all cells below the thermocline (Karner *et al.*,  
64 2001; Schattenuhofer *et al.*, 2009) and are integral organisms in oxygen  
65 minimum zones (Francis *et al.*, 2005; Coolen *et al.*, 2007; Lam *et al.*, 2009;  
66 Pitcher *et al.*, 2011; Stewart *et al.*, 2012; Beman *et al.*, 2012). In many  
67 marine environments, thaumarchaeal transcripts are among the most  
68 abundant that can be mapped to available prokaryotic genomes  
69 (Hollibaugh *et al.*, 2011; Baker *et al.*, 2012; Stewart *et al.*, 2012; Gifford *et al.*,  
70 2013). In these environments, the most frequently detected  
71 thaumarchaeal transcripts encode for proteins involved in ammonia  
72 oxidation and acquisition, including ammonia monooxygenase subunits  
73 (*amoABC*), ammonium transporters (*amtB*), a putative Cu-containing nitrite  
74 reductase (*nirK*), and structural cellular components (for example, S-layer  
75 proteins (Nakagawa and Stahl, 2013)). In addition to dissolved ammonia,  
76 some ammonia-oxidizing archaea utilize ammonia derived from urease-

77 catalyzed urea hydrolysis as a chemolithoautotrophic growth substrate (Qin  
78 *et al.*, 2014; Bayer *et al.*, 2015) and urease genes and transcripts believed  
79 to be of thaumarchaeal origin have been detected in marine environments  
80 (Shi *et al.*, 2010; Alonso-Sáez *et al.*, 2012; Pedneault *et al.*, 2014; Tolar,  
81 Ross, *et al.*, 2016). Despite the abundance of thaumarchaeal transcripts in  
82 natural assemblages, we still have a poor understanding of how the relative  
83 abundance of thaumarchaeal transcript markers such as *amoA*, *nirK* and  
84 *ureC* relate to nutrient and energy availability across environmental  
85 gradients.

86  
87 Thaumarchaeal ammonia oxidation is initiated by the oxidation of ammonia  
88 to hydroxylamine (NH<sub>2</sub>OH) by the ammonia monooxygenase enzyme  
89 complex (Amo) (Vajrala *et al.*, 2013), but the enzyme(s) catalyzing the  
90 oxidation of NH<sub>2</sub>OH to nitrite (NO<sub>2</sub><sup>-</sup>) have not been confirmed (Walker *et al.*,  
91 2010). Orthologs of the bacterial hydroxylamine oxidoreductase (Hao) or c-  
92 type cytochrome synthesis and assembly machinery, thought to be required  
93 for NH<sub>2</sub>OH oxidation and electron transfer in ammonia-oxidizing bacteria  
94 (AOB) (Arp *et al.*, 2007), are absent from all sequenced thaumarchaeal  
95 genomes (Stahl and la Torre, 2012; Spang *et al.*, 2012; Kerou *et al.*, 2016).  
96 Instead, unidentified Cu-containing metalloenzymes or F<sub>420</sub>-dependent  
97 monooxygenases are speculated to be involved in NH<sub>2</sub>OH oxidation and  
98 electron transfer to archaeal terminal oxidases (Walker *et al.*, 2010; Kerou  
99 *et al.*, 2016) and may involve nitric oxide (NO) as either a direct  
100 intermediate or an electron shuttle (Stieglmeier *et al.*, 2014; Martens-  
101 Habbenha *et al.*, 2015; Kozlowski *et al.*, 2016). While the precursor to NO  
102 has not yet been elucidated, all free-living thaumarchaea with complete  
103 genomes encode a Cu-containing multicopper oxidase with homology to  
104 Cu-dependent nitrite reductases (NirK) that may be responsible for the  
105 reduction of NO<sub>2</sub><sup>-</sup> to NO (Kerou *et al.*, 2016).

106  
107 ‘*Candidatus Nitrosopelagicus brevis*’ str. CN25 is a cultured representative  
108 of ubiquitous and abundant pelagic thaumarchaeal populations in the  
109 shallow oligotrophic ocean (Santoro and Casciotti, 2011; Santoro *et al.*,  
110 2015). Here, we describe the genome and transcriptome during urea-based  
111 growth of a *Ca. N. brevis* strain that can utilize ammonia cleaved from urea  
112 as a sole chemolithoautotrophic growth substrate. Additionally, we use *Ca.*  
113 *N. brevis* str. CN25 to investigate the transcriptional response to ammonia  
114 limitation in laboratory culture. These transcriptomes are further analyzed in

115 the context of several marine metatranscriptomes and used to identify  
116 conserved gene co-expression networks.

117

## 118 **Results and Discussion**

### 119 **'*Candidatus Nitrosopelagicus brevis*' strain U25 genome and**

120 **transcriptome:** A urea-utilizing thaumarchaeon was obtained from an  
121 ammonia-oxidizing enrichment culture (Santoro and Casciotti, 2011) via  
122 subculturing with urea as a sole nitrogen and energy source (see  
123 'Experimental Procedures') and used for the shotgun metagenome  
124 sequencing and experiments described here. After assembly and contig  
125 binning based on nucleotide frequencies and coverage, we obtained a  
126 three contig genome of this urea-utilizing thaumarchaeon (Supplementary  
127 Figure 1a). This genome is nearly identical to the *Ca. N. brevis* CN25  
128 genome with regards to *i*) gene content; *ii*) genome organization  
129 (Supplementary Figure 1b); and *iii*) genome wide average nucleotide  
130 identity (99.99%; Supplementary Figure 2). We found 19 additional genes  
131 at four distinct genomic loci in this strain, relative to CN25 (Supplementary  
132 Table 1). The largest of these insertions (15 contiguous genes) includes 11  
133 genes coding urea utilization machinery, including *ureABCDEFG*, which  
134 codes for urease and its chaperones, two urea sodium:solute symporter  
135 family (SSSF) transporters, a transcriptional regulator and several  
136 hypothetical proteins (Fig. 1a). We designate this urea-utilizing  
137 thaumarchaeon '*Candidatus Nitrosopelagicus brevis*' strain U25.

138

139 We sequenced a transcriptome from *Ca. N. brevis* str. U25 growing  
140 exponentially with urea as the growth substrate. Only one transcript from  
141 the chromosomal insertion containing the urea transport and metabolism  
142 genes (Fig. 1a) was among the top 50 transcripts detected: A7X95\_00990,  
143 coding for a putative urea SSSF transporter (ranked  $13.7 \pm 0.33$ ; mean  $\pm$   
144 SE,  $n = 3$ ). Surprisingly, transcripts coding for catalytic urease components,  
145 or the second putative urea SSSF transporter (A7X95\_00985) located  
146 immediately adjacent to A7X95\_00990, were not nearly as abundant as  
147 A7X95\_00990. For example, the mean expression levels of *ureC*, coding  
148 for the fused catalytic  $\alpha\beta$ -subunit of urease, and *ureA* ( $\gamma$  urease subunit)  
149 were 139 and 784-fold less abundant than that of A7X95\_00990,  
150 respectively (ranked  $390 \pm 19.7$  and  $950 \pm 50.8$ , respectively; mean  $\pm$  SD,  
151  $n=3$ ). A7X95\_00985, coding for the second urea SSSF transporter, was  
152 also expressed at a low level, comparable to *ureA*, ranked  $940 \pm 92.0$ .

153 During growth on urea, transcripts for genes coding for an ammonium  
154 transporter (AMT1), ammonia monooxygenase subunits (*amoAB*) and  
155 nitrite reductase (*nirk*) were within the top ten most abundant transcripts  
156 detected in strain U25.

157  
158 Although urea utilization genes have been detected in wild thaumarchaeal  
159 populations, we have a poor understanding of how the abundances of  
160 urease transcripts relate to growth and activity. To contextualize the  
161 expression patterns observed in U25, we compared the relative rank of the  
162 transcript abundances for only those genes coding for urea uptake and  
163 catabolism (Fig. 1a) under laboratory growth conditions to the relative rank  
164 of the transcript abundances of the same genes from several deeply  
165 sequenced marine metatranscriptomes. The SSSF urea transporter  
166 (A7X95\_00990) was the most abundant urea-related gene transcript in  
167 38% of the environmental datasets ( $n = 8$ ) we investigated (Fig. 1b). In  
168 contrast to culture conditions, where the SSSF urea transporter was the  
169 most abundant urea-related gene transcript, *ureC* was the most abundant  
170 transcript in 25% of the environmental datasets (Fig. 1b). This shows that  
171 variability in the relative transcriptional activity of urea transport and  
172 catabolism genes is not unusual. Our finding that *ureC* was not highly  
173 expressed in exponentially growing cells also helps to explain previous field  
174 observations of low *ureC* expression, and suggests the abundance of *ureC*  
175 transcripts may be a poor molecular biomarker of active urea-based  
176 nitrification. For example, *ureC* expression and urea-based nitrification  
177 were found to be only weakly correlated across several environments  
178 (Tolar, Wallsgrove, *et al.*, 2016), in contrast to high correlation between  
179 *amoA* expression and ammonia oxidation rates (J. M. Smith *et al.*, 2014).  
180 Similarly, in Arctic samples collected across seasons, *ureC* genes were  
181 detected, yet *ureC* transcripts were only sporadically detected and at low  
182 abundances (Pedneault *et al.*, 2014).

183  
184 **Transcriptional response to ammonia limitation in ‘*Ca. N. brevis*’**  
185 **strain CN25:** To understand adaptive mechanisms during ammonia  
186 starvation, we explored the transcriptional response of *Ca. N. brevis* CN25  
187 to ammonia limitation. A total of 51 gene transcripts were differentially  
188 abundant when comparing the exponential growth phase of CN25 to  
189 ammonia-limited stationary phase (generalized linear model likelihood ratio  
190 test  $FDR \leq 0.01$  and  $\geq 2$ -fold change in abundance; Supplementary Table

191 2). The gene transcripts that were significantly less abundant in stationary  
192 phase included *amoA*, *amoB*, *nirK*, both *amtB*-like ammonium transporters  
193 (AMT1=T478\_1378; AMT2=T478\_1350), several additional Cu-containing  
194 metalloenzymes, and two ferredoxin-like 4Fe-4S binding domain proteins  
195 (Fd1=T478\_1472 and Fd2=T478\_1259) (Fig. 2, Supplementary Table 2).  
196 The downregulation of *amoA*, *amoB* and *nirK* in ammonia-limiting  
197 conditions was recently shown for the ammonia-oxidizing thaumarchaeon  
198 *Nitrosopumilus maritimus* using DNA microarrays (Qin *et al.*, 2017),  
199 suggesting that one adaptation of ammonia-oxidizing archaea to ammonia  
200 limitation is to reduce the relative expression of energy generation  
201 machinery.

202  
203 Only two genes, T478\_1481, coding an Hsp20/ $\alpha$ -crystallin domain small  
204 heat shock protein, and T478\_1394, annotated as a hypothetical protein,  
205 were significantly more abundant (~10-fold) in ammonia-limited stationary  
206 phase (Fig. 2, Supplementary Table 2). Hsp20 is a molecular chaperone  
207 that enhances thermotolerance and binds to unfolded proteins to prevent  
208 aggregation (Li *et al.*, 2011). The higher proportion of Hsp20 transcripts  
209 and concomitant decrease in proportion of transcripts coding enzymes  
210 integral to energy production suggests that one adaptation *Ca. N. brevis*  
211 employs in ammonia-limited stationary phase may be to protect existing  
212 proteins from degradation. Nutrient stress has been shown to induce the  
213 expression of molecular chaperone proteins in ammonia-oxidizing archaea,  
214 ammonia-oxidizing bacteria, and oligotrophic marine heterotrophs. For  
215 example, in *N. maritimus*, two copies of Hsp20 were differentially  
216 expressed during copper stress and recovery, but not during ammonia  
217 starvation (Qin *et al.*, 2017). Similar to our findings regarding Hsp20,  
218 *Nitrosomonas europaea* expressed peptides for the molecular chaperone  
219 GroEL in both energy starved and energy replete conditions, but at  
220 significantly greater levels under energy starvation (Pellitteri-Hahn *et al.*,  
221 2011). The authors speculated that energy stress may induce chaperone  
222 expression as part of a generalized stress response, and that these  
223 chaperones are involved in protein protection (Pellitteri-Hahn *et al.*, 2011).  
224 Similarly, the marine chemoorganoheterotroph '*Candidatus Pelagibacter*  
225 *ubique*' induced GroEL protein expression under N-starvation (D. P. Smith  
226 *et al.*, 2013), GroES under iron starvation (D. P. Smith *et al.*, 2010), and the  
227 heat shock protein IpbA in nutrient-limited stationary phase (D. P. Smith *et*  
228 *al.*, 2016). These finding suggest that one role of molecular chaperones

229 during nutrient stress may be to protect key enzymes from proteolytic  
230 turnover when cells scavenge peptides to support nutrient-limited  
231 sustenance.

232  
233 In contrast to the finding that only two genes were more abundant in  
234 ammonia-limited stationary phase for *Ca. N. brevis*, over 200 genes were  
235 upregulated in ammonia-limited stationary phase for *N. maritimus* (Qin *et al.*,  
236 2017). One explanation for this observation is that *Ca. N. brevis* has a  
237 reduced capacity to sense and respond to environmental change as a  
238 result of its small genome (Santoro *et al.*, 2015). Alternatively, our  
239 conservative statistical thresholding may have resulted in a reduced  
240 number of genes defined as differentially expressed. While it is important to  
241 note that our experimental design cannot distinguish between responses to  
242 energy limitation versus anabolic nitrogen limitation, transcriptional  
243 responses to ammonium limitation that involved the upregulation of only a  
244 few genes has been described for both ammonia-oxidizing bacteria and  
245 oligotrophic marine bacteria. For example, in the bacterium *N. europaea*,  
246 only 0.42% of the genome was upregulated under N-starvation (Wei *et al.*,  
247 2006). Similarly, '*Ca. P. ubiquus*,' exhibited a weak transcriptional response  
248 to N-starvation (D. P. Smith *et al.*, 2013). The similar lack of transcriptional  
249 responses to nitrogen starvation by *Ca. N. brevis* and *Ca. P. ubiquus* are  
250 consistent with observations that organisms with small and potentially  
251 streamlined genomes have a limited capacity to respond rapidly to  
252 environmental change (Giovannoni *et al.*, 2014; Cottrell and Kirchman,  
253 2016; Giovannoni, 2017; Satinsky *et al.*, 2017).

254  
255 Despite significantly different transcript abundances of essential ammonia  
256 oxidation and transport genes across growth conditions, the rank order of  
257 these transcripts within a given treatment were similar, irrespective of  
258 growth condition. In particular, the most abundant gene transcripts in  
259 exponential phase were generally still the most abundant transcripts in  
260 ammonium-limited stationary phase (Fig. 2b). For example, transcripts for  
261 32 genes (64%) were in the top 50 most abundant transcripts in both  
262 exponential and stationary phase (Fig. 2b). Interestingly, the abundances of  
263 18 of these transcripts were also significantly different across treatments  
264 (Fig. 2b), illustrating that although transcripts can be differentially abundant  
265 across paired treatments, the changes in their relative cellular abundance  
266 may be subtler. Several of these consistently abundant but differentially

267 expressed transcripts are common molecular markers predicted to be  
268 essential for ammonia oxidation and transport, including the ammonium  
269 transporters AMT1 and AMT2, ammonia monooxygenase subunits  
270 (*amoAB*) and nitrite reductase (*nirk*). This suggests that the proportional  
271 changes we observed in highly-expressed genes may be the result of  
272 abundance changes in other genes that make up a smaller proportion of  
273 the transcriptome, such as Hsp20, and that even though we observe  
274 significant differences across treatments, the underlying transcript  
275 abundances might be similar.

276  
277 The ammonia monooxygenase C subunit (AmoC) has been implicated in  
278 stress response (Berube and Stahl, 2012) and recovery from ammonia  
279 starvation in *N. europaea* (Berube *et al.*, 2007). The participation of AmoC  
280 in ammonium starvation appears to be conserved in thaumarchaeal  
281 ammonia oxidizers, where *amoC* transcript levels remained high in  
282 ammonia-limited stationary phase (Qin *et al.*, 2017). Consistent with these  
283 findings, *amoC* was abundant in both exponential and N-limited stationary  
284 phase in CN25 (the 13<sup>th</sup> and 7<sup>th</sup> most abundant transcript, respectively),  
285 and we did not observe a significant difference in the abundance of *amoC*  
286 across growth phases (Fig. 2).

287  
288 **Correlated gene expression across disparate environments:** Controlled  
289 laboratory experiments such as those described above help us to  
290 understand gene regulation by isolating one experimental variable at a  
291 time. However, gene expression patterns observed in natural  
292 thaumarchaeal populations are the result of cells responding to complex  
293 and dynamic environmental conditions that can be cryptic and difficult to  
294 mimic in the laboratory. To identify clusters of co-expressed genes across  
295 disparate environmental conditions, and relate them to our laboratory  
296 findings, we constructed and analyzed a gene expression correlation  
297 network constructed from transcriptomes of exponentially growing CN25  
298 and U25 cultures and marine metatranscriptomes. Although 64  
299 metatranscriptomes were mapped to the *Ca. N. brevis* genomes, only ten  
300 met our strict criteria for inclusion in the network analysis presented here  
301 (see ‘Experimental Procedures’, below). The transcription of 1,407 of the  
302 1,464 non-redundant genes in the two *Ca. N. brevis* genomes was  
303 significantly positively correlated with at least one other gene (Pearson’s  $r \geq$   
304 0.80,  $q \leq 0.025$ ; Fig. 3, Supplementary Table 3). Network modularity is a



305 measure of the group connectivity within a network, where connections  
306 contained within a module are denser than connections between modules.  
307 Modularity values range from -0.5 to 1, where 1 describes a highly modular  
308 system. The modularity of this positive correlation network was 0.71,  
309 indicating a high degree of modularity. Genes with positively correlated  
310 expression organized into 38 groups (modules), ranging in membership  
311 size from 2 to 236 genes (mean module size = 38.0 genes).

312

313 Genes encoding putative components of the core ammonia oxidation and  
314 transport machinery are significantly co-expressed across distinct  
315 environmental and laboratory conditions. A single 15-gene module (module  
316 11 in Fig. 3) contained: *amoABCX*, *AMT1*, *nirK*, two PEFG-CTERM domain  
317 proteins, *Fd1* and *Fd2*, an Fe-S cluster assembly protein, a membrane  
318 bound cupredoxin-containing protein, and three hypothetical proteins.  
319 Further investigation of these hypothetical proteins suggests that  
320 (T478\_0057) is a putative archaeal cell division protein related to the  
321 endosomal sorting complexes involved in membrane trafficking (ESCRT)-III  
322 (Lindås *et al.*, 2008; Spang *et al.*, 2015). Our finding that *amoA*, *amoB* and  
323 *nirK* transcripts are abundant and co-expressed with other genes coding for  
324 membrane-bound Cu-containing metalloproteins (T478\_1362 and  
325 T478\_0895) implies the products of these genes may participate in  
326 ammonia oxidation. Previous speculation implicated membrane-bound  
327 multicopper oxidases (Walker *et al.*, 2010; Stahl and la Torre, 2012;  
328 Kozłowski *et al.*, 2016) or novel F<sub>420</sub>-dependent monooxygenases (Kerou *et al.*,  
329 2016) in ammonia oxidation chemolithotrophy (specifically NH<sub>2</sub>OH  
330 oxidation) based on Cu redox chemistry or ortholog conservation across  
331 thaumarchaeal genomes. However, the genes put forth in those studies  
332 were not present in module 11 (referred to as the AMO module, herein),  
333 suggesting they may not be involved in core energy metabolism (Fig. 3,  
334 Supplementary Table 3). For example, a multicopper oxidase present in the  
335 genomes of both *N. brevis* (T478\_0261) and *N. maritimus* (Nmar\_1663)  
336 previously implicated to be involved in the oxidation of hydroxylamine to  
337 nitrite (Walker *et al.*, 2010; Qin *et al.*, 2017) was not present in the AMO  
338 module (Supplementary Table 3).

339

340 On average, the AMO module is expressed at a higher level than other  
341 modules, and was more abundant in conditions where ammonia oxidation  
342 rates and thaumarchaeal abundances would be predicted to be high (Fig.

343 4). For example, consistent with previous reports of higher ammonia  
344 oxidation rates within hydrothermal plumes (Lam *et al.*, 2004), we show  
345 that the AMO module is expressed highly within the Guyamas Deep  
346 hydrothermal plume, relative to background samples (Fig. 4). Moreover,  
347 similar to reports of increased thaumarchaeal gene expression in the  
348 mesopelagic (Church *et al.*, 2010), the AMO module is less abundant in the  
349 surface waters of Landsort Deep (0 and 5 m), relative to deeper waters (90  
350 and 200 m) (Fig. 4).

351  
352 **A new proposed model for thaumarchaeal chemolithotrophy via**  
353 **ammonia oxidation:** A previous model of thaumarchaeal ammonia  
354 oxidation proposed NO is derived from the reduction of NO<sub>2</sub><sup>-</sup> by NirK, and  
355 that this NO is subsequently used to oxidize NH<sub>2</sub>OH (Kozlowski *et al.*,  
356 2016). However, this model does not agree with tracer experiments using  
357 <sup>18</sup>O labeled water, which show that only one O atom from water is  
358 incorporated into NO<sub>2</sub><sup>-</sup> produced by thaumarchaea (Santoro *et al.*, 2011;  
359 Buchwald *et al.*, 2012). If NO<sub>2</sub><sup>-</sup> was reduced to NO and used to produce  
360 additional NO<sub>2</sub><sup>-</sup>, the resulting NO<sub>2</sub><sup>-</sup> would retain an average of more than  
361 one O atom from water. Based on the co-expression data presented here,  
362 we propose two alternative models of thaumarchaeal ammonia oxidation  
363 that are consistent with previous isotope tracer data regarding the source of  
364 O atoms in NO<sub>2</sub><sup>-</sup>. In both models, NirK and two membrane-anchored  
365 cupredoxins (T478\_1362 and T478\_0895) act in concert to oxidize NH<sub>2</sub>OH  
366 to NO<sub>2</sub><sup>-</sup> in two steps: a three-electron oxidation of NH<sub>2</sub>OH to NO, followed  
367 by a one-electron oxidation of NO to NO<sub>2</sub><sup>-</sup> (Supplementary Figure 3). The  
368 involvement of T478\_0895 orthologs in electron transfer with NirK, is  
369 consistent with previous predictions based on gene expression data for *N.*  
370 *maritimus* (Qin *et al.*, 2017). Both proposed pathways are also consistent  
371 with the observed co-expression and high abundance of these transcripts  
372 across distinct environmental conditions (Figs 2-4; (Hollibaugh *et al.*, 2011;  
373 Baker *et al.*, 2012; Stewart *et al.*, 2012; Gifford *et al.*, 2013)). The predicted  
374 localization of ammonia oxidation in the pseudoperiplasm (Walker *et al.*,  
375 2010) is also a key aspect of the proposed models, as protein domain  
376 analysis with InterPro (Jones *et al.*, 2014) indicates all proteins in these  
377 models, and pertinent cupredoxin domains, are likely localized in the  
378 pseudoperiplasmic space. While we cannot determine which reaction is  
379 conducted by which Cu metalloenzyme, both scenarios are more

380 parsimonious than existing models and are plausible based on existing  
381 bioinorganic chemistry literature.

382

383 Similar to the *N. maritimus* transcriptome and environmental  
384 metatranscriptomes (Hollibaugh *et al.*, 2011; Williams *et al.*, 2012; Qin *et*  
385 *al.*, 2017), ferredoxins were among the most highly expressed genes in *N.*  
386 *brevis* (Fig. 2). However, we were surprised to find these ferredoxins (Fd1  
387 and Fd2) and an Fe-S cluster assembly protein co-expressed with  
388 ammonia oxidation genes in the AMO module. The co-expression of  
389 ferredoxins in the AMO module suggests a central role for Fe-S cluster-  
390 containing proteins in the electron transport chain of thaumarchaea. Both  
391 Fd1 and Fd2 lack discernable signal sequences or PEEG domains,  
392 suggesting that they are localized in the cytoplasm. Ferredoxin-containing  
393 DNA binding transcriptional regulators have been implicated as NO sensors  
394 (Kiley and Beinert, 2003). However, there are no predicted DNA-binding  
395 domains in Fd1 or Fd2. Sequence structure threading of Fd1 and Fd2 with  
396 phyre2 (Kelley *et al.*, 2015) returned best structural matches to NADH  
397 dehydrogenase (ubiquinone) iron-sulfur protein 8 (threading confidence  
398 score = 99.8% for both Fd1 and Fd2; coverage of Fd1 was 99% and 71%  
399 for Fd2). Thus, we speculate that Fd1 and Fd2 participate in supplying  
400 electrons to the ubiquinone pool, and thus may be involved in supplying the  
401 electrons necessary to initiate ammonia oxidation via Amo.

402

403 Microbial gene expression is inherently modular. For example, functionally  
404 related genes are often co-expressed in operons or regulons as a response  
405 to external environmental signals (Freyre-Gonzales *et al.*, 2010). However,  
406 the organization and patterns of population-level gene expression in  
407 dynamic environments are poorly understood. Although we show a high  
408 degree of modularity and correlated expression of a set of genes likely  
409 involved in ammonia oxidation, the gene membership of the remaining  
410 modules did not reveal a clear pattern of how the genes contained within a  
411 given module are functionally related (Supplementary Table 3). For  
412 example, genes coding for the modified 3-hydroxypropionate/ 4-  
413 hydroxybutyrate carbon fixation pathway proteins are dispersed across  
414 five modules (module numbers 3, 4, 18, 21, and 36; Fig. 3 and  
415 Supplementary Table 3). Similarly, vitamin B<sub>12</sub>-production genes are spread  
416 across eight modules (module numbers 1, 3, 4, 10, 12, 18, 21, and 26; Fig.  
417 3 and Supplementary Table 3). The structure of the transcription co-

418 expression network illustrated in Fig. 3 is consistent with the interpretation  
419 that thaumarchaeal population-level regulatory organization is structured in  
420 a decentralized manner. One explanation for this organization may be that  
421 decentralized expression networks may help to buffer gene expression  
422 changes or maintain genetic diversity in dynamic environments through a  
423 suite of feedbacks without centralized regulatory mechanisms (Hartwell *et*  
424 *al.*, 1999).

425  
426 Other reasons the gene membership in the co-expression modules may not  
427 reveal clear functional relationships may stem from the environments  
428 sampled or the analysis techniques used. For example, our methods likely  
429 underestimate the true modularity of *Ca. N. brevis* gene expression. Some  
430 of the larger expression modules may comprise distinct modules that we  
431 could not resolve because we did not sample an environment with  
432 physicochemical parameters necessary to resolve subtle gene expression  
433 patterns. Second, although our goal was to be conservative in our network  
434 construction, we may be missing important network structural components  
435 because of the thresholding parameters or our analysis techniques. Further  
436 resolution of such gene expression patterns would require deeply  
437 sequenced metatranscriptomes from additional distinct environments and  
438 transcriptome analysis of additional thaumarchaea grown under diverse  
439 culture conditions. Future research into understanding why certain genes or  
440 pathways are co-expressed with one another, and how transcript  
441 abundances manifest into functional potential in each environment or  
442 culture setting would be necessary to fully disentangle the gene expression  
443 we observe here.

#### 444 445 **Conclusions:**

446 Here we show the rank of most thaumarchaeal transcripts reported as  
447 being abundant in the environment (*amoABC*, both *amtB* genes and *nirK*,  
448 for example) are relatively invariant across growth phases and  
449 environmental conditions. That is, within a given treatment, abundant  
450 genes are consistently proportionally abundant, irrespective of growth  
451 condition. However, consistent with other studies of thaumarchaeal  
452 transcription, the proportions of some of these genes were indeed  
453 significantly differentially abundant across paired treatments, indicating  
454 ammonia availability did affect the proportional abundances of ammonia  
455 oxidation and transport transcripts. One explanation for this observation is

456 that although these transcripts are not ‘constitutive’ in a classic sense (that  
457 is, they are differentially abundant across paired experiments), they are  
458 instead ‘affluent,’ in that they make up a large part of the total transcript  
459 pool, irrespective of growth condition.

460  
461 Discovering gene function in fastidious or uncultivated lineages remains  
462 one of the biggest challenges in environmental microbiology. Narrowing the  
463 scope of targets for detailed biochemical investigation is difficult because  
464 manipulative experiments are limited in their ability to identify networks of  
465 co-regulated genes by the number of environmental parameters we can  
466 recreate in a laboratory. The approach used here leverages *in situ*  
467 transcript abundance data - in which the environmental conditions are  
468 incompletely characterized - to identify genes that share similar  
469 transcription patterns. In addition to our putative models of ammonia  
470 oxidation in thaumarchaea, this approach shows that 4Fe-4S cluster-  
471 containing proteins likely have an important role in ammonia oxidation,  
472 indicating a role for iron in archaeal nitrification, which has been previously  
473 under appreciated. Detailed biochemical characterization of NirK, other  
474 cupredoxin-containing proteins, Fd1 and Fd2 is the next step in  
475 understanding their specific role in core thaumarchaeal energy metabolism.

476

#### 477 **Methods:**

478 *Organism sources:* Both ‘*Candidatus Nitrosopelagicus brevis*’ str. CN25  
479 and ‘*Ca. N. brevis*’ str. U25 were obtained from an ammonia-oxidizing  
480 enrichment culture previously known as CN25 (Santoro and Casciotti,  
481 2011) grown on Oligotrophic North Pacific Medium. Oligotrophic North  
482 Pacific Medium (ONP) consists of natural seawater, a  
483 chemolithoautotrophic nitrogen source (NH<sub>4</sub>Cl or urea), ampicillin (10.8  
484 μM), streptomycin (68.6 μM), potassium phosphate (29.4 μM), and a  
485 chelated trace metal mix consisting of disodium ethylenediaminetetraacetic  
486 acid (14 μM), FeCl<sub>2</sub> (7.25 μM), ZnCl<sub>2</sub> (0.5 μM), MnCl<sub>2</sub> (0.5 μM), H<sub>3</sub>BO<sub>3</sub> (1  
487 μM), CoCl<sub>2</sub>·6H<sub>2</sub>O (0.8 μM), CuCl<sub>2</sub>·2H<sub>2</sub>O (0.1 μM), NiCl<sub>2</sub>·H<sub>2</sub>O (0.1 μM),  
488 Na<sub>2</sub>MoO<sub>4</sub>·2H<sub>2</sub>O (0.15 μM). Preliminary metagenomic sequencing of the  
489 original CN25 enrichment indicated the presence of urease genes in a  
490 minority of the archaeal population. Sequential transfers of the initial  
491 enrichment were made into ONP (Santoro and Casciotti, 2011) amended  
492 with 50-100 μM urea, instead of NH<sub>4</sub>Cl, over a period of ~48 months. In  
493 parallel, separate transfers of the CN25 enrichment culture were

494 propagated using NH<sub>4</sub>Cl as a nitrogen and energy source, but without the  
495 use of streptomycin, which could potentially serve as a source of urea  
496 (Klein and Pramer, 1961). The enrichment culture resulting from the  
497 propagation with NH<sub>4</sub>Cl did not contain amplifiable *ureC* genes by PCR,  
498 using the archaeal-specific ureC primers Thaum\_UreC F and Thaum\_UreC  
499 R (Yakimov *et al.*, 2011) before the sequencing and genome analysis  
500 described elsewhere (Santoro *et al.*, 2015).

501  
502 *General cultivation conditions:* All thaumarchaeal enrichments were  
503 propagated in in ONP medium in a base of aged natural seawater  
504 (collected from 10 m depth at 15°S, 173°W on 23 October 2011; 0.2 μm  
505 pore size filtered at sea) amended with 50 or 100 μM NH<sub>4</sub>Cl or 100 μM  
506 urea as the chemolithoautotrophic substrate. All cultures were propagated  
507 in 250 mL polycarbonate flasks at 22°C in the dark and monitored for NO<sub>2</sub><sup>-</sup>  
508 production using the Griess reagent colorimetric method (Strickland and  
509 Parsons, 1972). Cell counts were obtained with a Millipore Guava  
510 EasyCyte 5HT flow cytometer as described previously (Tripp, 2008).

511  
512 *Cell harvesting for and genome sequencing of 'Ca. N. brevis' str. U25:* The  
513 *Ca. N. brevis* U25 enrichment culture that was grown exclusively with urea  
514 as the sole chemolithoautotrophic growth substrate for >50 generations,  
515 was harvested by filtration on to 25 mm diameter, 0.22 μm pore-size Supor-  
516 200 filters and frozen at -80°C. DNA was extracted using a DNeasy blood &  
517 Tissue DNA extraction kit (Qiagen, Valencia, CA, USA), following the  
518 manufacturer's instructions. The DNA was treated with RNase and  
519 examined using a Bioanalyzer 2100 (Agilent) with 500 ng serving as the  
520 input for library construction (NEBNext paired-end DNA Library Prep kit,  
521 New England Biolabs). The sample was sequenced on an Illumina MiSEQ  
522 (v2 chemistry, paired 250 bp reads). Reads were quality trimmed and  
523 served as the inputs to assembly with metaSPAdes (v 0.5, 70mer) (Nurk *et al.*  
524 *et al.*, 2017). The K-mer usage and phylogenetic annotation of the assembled  
525 contigs were then used to visually identify a putative thaumarchaeal bin  
526 (Supplementary Figure 1a) (Laczny *et al.*, 2015). The 3 contig genome was  
527 annotated using the JGI IMG pipeline ([img.jgi.doe.gov](http://img.jgi.doe.gov)) and the PGAP  
528 pipeline at NCBI (Zhao *et al.*, 2011).

529  
530 *Experimental design, cell harvesting and RNA extraction for culture*  
531 *transcriptomes:* For experiments investigating the effects of ammonia

532 limitation, ONP medium was amended with 50  $\mu\text{M}$   $\text{NH}_4\text{Cl}$  as the  
533 chemolithoautotrophic growth substrate. In this experiment, six replicates  
534 were prepared, three of which were harvested in late exponential phase  
535 (Exponential phase) and three of which were harvested in late  $\text{NH}_4\text{Cl}$ -  
536 limited stationary phase (Stationary phase) (Supplementary Fig. 4). We  
537 deliberately harvested the exponential phase cultures in late exponential  
538 phase to ensure maximal cell biomass for transcriptome analysis. The  
539 length of starvation in stationary-phase was based on the exponential-  
540 phase doubling time of seven days, approximately the population doubling  
541 time during exponential growth.  $\text{NH}_4\text{Cl}$ -limitation in this phase is supported  
542 by a linear dose response in maximal cell density to  $\text{NH}_4\text{Cl}$  additions  
543 (Supplementary Fig. 5).

544  
545 Transcriptomes that were included in the network analysis were obtained  
546 from distinct, mid-exponential phase *Ca. N. brevis* strains CN25 and U25,  
547 that were growing on ONP medium amended with either 100  $\mu\text{M}$   $\text{NH}_4\text{Cl}$   
548 (str. CN25; n=3) or 100  $\mu\text{M}$  urea (str. U25; n=3) as growth substrates,  
549 respectively (Supplementary Fig. 6). Cells were harvested by filtration on to  
550 25 mm diameter, 0.22  $\mu\text{m}$  pore-size Supor-200 filters and frozen at  $-80^\circ\text{C}$ .  
551 For RNA extraction, cells were disrupted as described in (Santoro *et al.*,  
552 2010). RNA was extracted using TRIzol LS reagent (Ambion-Life  
553 Technologies) per the manufacturer's instructions and stored in nuclease-  
554 free water at  $-80^\circ\text{C}$ . Urea consumption by str. U25 was determined  
555 colorimetrically using the diacetyl monoxime method (Price and Harrison,  
556 1987) (Supplementary Fig. 7).

557  
558 *Transcriptome sequencing and mapping for culture experiments:*  
559 Transcriptome samples were prepared for sequencing using the TotalScript  
560 RNA-Seq kit (Epicentre-Illumina), which biases against rRNA, using the  
561 manufacturer recommended protocol. Libraries were trial sequenced on an  
562 Illumina MiSEQ to determine uniformity between barcodes and then fully  
563 sequenced in one 300 cycle NextSEQ run which generated 246.6 million  
564 paired-end 150 bp reads. Raw Illumina reads in fastq format were  
565 interleaved to match paired ends. Sequencing primers and barcode  
566 indexes were identified by BLAST against the NCBI vector database and  
567 trimmed along with regions with Q scores  $< 30$ . Reads mapping to  
568 ribosomal RNAs were identified and removed using ribopicker (Schmieder  
569 *et al.*, 2011). Reads were then mapped to *Ca. N. brevis* genomes at 90%

570 nucleotide identity with CLC Genomics Workbench (command:  
571 `clc_ref_assemble -s 0.9`). Raw read counts per open reading frame (ORF)  
572 were compiled.

573

574 *Analysis of differentially abundant gene transcripts:* Differential gene  
575 abundance analysis was performed using a generalized linear model  
576 likelihood ratio test in the edgeR software package (v 3.8.5) (Robinson and  
577 Smyth, 2008). We defined significant differential abundance as those  
578 genes with a false discovery rate (FDR)  $\leq 0.01$  and greater than 2-fold  
579 abundance change across treatments.

580

581 *Rank Analyses:* Raw read counts per ORF were scaled to expression units  
582 of reads per base per million reads mapped ( $RPKM = (10^6 * C) / (NL / 10^3)$ )  
583 where C is the number of transcript reads mapped to an ORF; N is total  
584 reads mapped to all ORFs in the genome; and L is the ORF length in base  
585 pairs (Mortazavi *et al.*, 2008). RPKM values were subsequently ranked,  
586 with a rank of 1 depicting the most abundant transcript within a given  
587 treatment. Rank ties within a treatment were averaged.

588

589 *Metatranscriptome mapping to genomes of *Ca. N. brevis* strains:* Sequence  
590 reads from 68 metatranscriptomes were mapped to the *Ca. N. brevis*  
591 genomes at 50% nucleotide identity using CLC Genomics Workbench  
592 (command: `clc_ref_assemble -s 0.5`) (Supplementary Table 4). The  
593 number of metatranscriptome reads that mapped to the *Ca. N. brevis*  
594 genomes were variable and ranged from 10 reads to 236,954 reads and  
595 mapped to 0.5-89% of the unique genes in the *Ca. N. brevis* genomes  
596 (Supplementary Table 4). Raw read counts per ORF were then compiled  
597 (ORF n=1445 for str. CN25 and n=1461 for U25).

598

599 *Network construction:* Only those metatranscriptomes that mapped to  
600  $\geq 45\%$  of the ORFs in the *Ca. N. brevis* genomes, along with the  
601 transcriptomes from *Ca. N. brevis* strains CN25 and U25 growing in  
602 exponential phase initiated with 100  $\mu\text{M}$   $\text{NH}_4\text{Cl}$  or urea, respectively, were  
603 included for network analysis. Of the 68 metatranscriptomes mapped to the  
604 *Ca. N. brevis* genomes, only ten passed this filtering step and were used  
605 for network analysis (Supplementary Table 4). Read counts were scaled to  
606 RPKM expression units. RPKM scores calculated for individual culture  
607 transcriptome replicates were averaged (n=3) to avoid pseudo-replication



608 effects in the network. The resulting RPKM expression values were rank-  
609 normalized to Van der Waerden (VdW) scores using the formula ( $s = \Phi^{-1}(r /$   
610  $(n+1))$ ), where  $s$  is the VdW score for a gene,  $r$  is the rank for that  
611 observation,  $n$  is the sample size and  $\Phi$  is the  $\Phi^{\text{th}}$  quantile from the  
612 standard normal distribution using *tRank* in the multic R package (Lunde *et*  
613 *al.*). Pearson correlation coefficients and  $P$  value estimates were calculated  
614 for all gene:gene pairs across the VdW-normalized metatranscriptomes  
615 and culture experiments ( $n=10$  and  $2$ , respectively) with the *rcorr* command  
616 in the Hmisc R package (Harrell and Dupont). To correct for multiple  
617 hypothesis testing,  $q$  values were computed from  $P$  value estimates using  
618 the *qvalue* R package (Storey and Tibshirani, 2003). Correlations with a  $q$   
619 value  $\leq 0.025$  were used for network analysis. All correlations at this  
620 threshold were strongly correlated (Pearson's  $r \geq 0.8$ ).

621  
622 **Network Statistics:** Network modularity and module membership were  
623 calculated in Gephi (0.8.2 beta) with the following settings: resolution 1.0,  
624 randomized and unweighted (Blondel *et al.*, 2008). The resulting network  
625 was visualized using the Fruchterman-Reingold algorithm in Gephi.

#### 626 **Data Availability/Sources:**

627  
628 Transcriptomes from *Ca. N. brevis* str. CN25 and U25 can be found in the  
629 NCBI BioSample archive under accession numbers SAMN6290440-  
630 6290457. The U25 genome has been deposited at DDBJ/ENA/GenBank  
631 under the accession LXWN00000000. The version described in this paper  
632 is version LXWN01000000. The metatranscriptomic data from Landsort  
633 Deep in the Baltic is available from the Sequence Read Archive under  
634 numbers SAMN04943349-SAMN04943415.

635 Other metatranscriptomes analyzed in the network are publically available  
636 through iMicrobe (<https://imicrobe.us>) or NCBI's Short Read Archive  
637 through the following accession numbers: CAM\_PROJ\_Sapelo2008,  
638 CAM\_PROJ\_AmazonRiverPlume, CAM\_PROJ\_PacificOcean,  
639 CAM\_P\_0000545, SRA023632.1.

#### 640 **Acknowledgements:**

641  
642  
643 This research was supported by NSF awards OCE-1260006, OCE-  
644 1437310, and DBI-1318455 to AES. CLD was supported by NSF OCE-  
645 1259994. We thank Matt Rawls for urea measurements, Mike Stukel for

646 obtaining oligotrophic seawater, and Albert Barberán and Jason Corwin for  
647 discussions regarding network construction. AES is an Alfred P. Sloan  
648 Research Fellow in Ocean Sciences.

649  
650

## 651 **References:**

- 652 Alonso-Sáez, L., Waller, A.S., Mende, D.R., Bakker, K., Farnelid, H.,  
653 Yager, P.L., et al. (2012) Role for urea in nitrification by polar marine  
654 Archaea. *Proc. Natl. Acad. Sci. U.S.A.* **109**: 17989–17994.
- 655 Arp, D.J., Chain, P.S.G., and Klotz, M.G. (2007) The impact of genome  
656 analyses on our understanding of ammonia-oxidizing bacteria. *Annu.*  
657 *Rev. Microbiol.* **61**: 503–528.
- 658 Baker, B.J., Lesniewski, R.A., and Dick, G.J. (2012) Genome-enabled  
659 transcriptomics reveals archaeal populations that drive nitrification in a  
660 deep-sea hydrothermal plume. *The ISME Journal* **6**: 2269–2279.
- 661 Bayer, B., Vojvoda, J., Offre, P., Alves, R.J.E., Elisabeth, N.H., Garcia,  
662 J.A., et al. (2015) Physiological and genomic characterization of two  
663 novel marine thaumarchaeal strains indicates niche differentiation. *The*  
664 *ISME Journal* **10**: 1051–1063.
- 665 Beman, J.M., Popp, B.N., and Alford, S.E. (2012) Quantification of  
666 ammonia oxidation rates and ammonia-oxidizing archaea and bacteria  
667 at high resolution in the Gulf of California and eastern tropical North  
668 Pacific Ocean. *Limnol. Oceanogr.* **57**: 711–726.
- 669 Berube, P.M. and Stahl, D.A. (2012) The divergent AmoC3 subunit of  
670 ammonia monooxygenase functions as part of a stress response  
671 system in *Nitrosomonas europaea*. *Journal of Bacteriology* **194**: 3448–  
672 3456.
- 673 Berube, P.M., Samudrala, R., and Stahl, D.A. (2007) Transcription of all  
674 amoC copies is associated with recovery of *Nitrosomonas europaea*  
675 from ammonia starvation. *Journal of Bacteriology* **189**: 3935–3944.
- 676 Blondel, V.D., Guillaume, J.-L., Lambiotte, R., and Lefebvre, E. (2008) Fast  
677 unfolding of communities in large networks. *Journal of Statistical*  
678 *Mechanics: Theory and Experiment* **10**: 10008–.
- 679 Buchwald, C., Santoro, A.E., McIlvin, M.R., and Casciotti, K.L. (2012)  
680 Oxygen isotopic composition of nitrate and nitrite produced by nitrifying  
681 cocultures and natural marine assemblages. *Limnol. Oceanogr.* **57**:  
682 1361–1375.
- 683 Church, M.J., Wai, B., Karl, D.M., and DeLong, E.F. (2010) Abundances of

- 684 crenarchaeal *amoA* genes and transcripts in the Pacific Ocean.  
685 *Environmental Microbiology* **12**: 679–688.
- 686 Coolen, M.J.L., Abbas, B., van Bleijswijk, J., Hopmans, E.C., Kuypers,  
687 M.M.M., Wakeham, S.G., and Sinninghe Damsté, J.S. (2007) Putative  
688 ammonia-oxidizing Crenarchaeota in suboxic waters of the Black Sea: a  
689 basin-wide ecological study using 16S ribosomal and functional genes  
690 and membrane lipids. *Environmental Microbiology* **9**: 1001–1016.
- 691 Cottrell, M.T. and Kirchman, D.L. (2016) Transcriptional control in marine  
692 copiotrophic and oligotrophic bacteria with streamlined genomes.  
693 *Applied and Environmental Microbiology* **82**: 6010–6018.
- 694 Francis, C.A., Roberts, K.J., Beman, J.M., Santoro, A.E., and Oakley, B.B.  
695 (2005) Ubiquity and diversity of ammonia-oxidizing archaea in water  
696 columns and sediments of the ocean. *Proc. Natl. Acad. Sci. U.S.A.* **102**:  
697 14683–14688.
- 698 Freyre-Gonzales, J.A., Educ, L.T.-Q.N., 2010 (2010) Analyzing regulatory  
699 networks in bacteria. *Nature Education* **3**: 24–27.
- 700 Gifford, S.M., Sharma, S., Booth, M., and Moran, M.A. (2013) Expression  
701 patterns reveal niche diversification in a marine microbial assemblage.  
702 *The ISME Journal* **7**: 281–298.
- 703 Giovannoni, S.J. (2017) SAR11 Bacteria: The most abundant plankton in  
704 the oceans. *Annu. Rev. Marine. Sci.* **9**: 231–255.
- 705 Giovannoni, S.J., Cameron Thrash, J., and Temperton, B. (2014)  
706 Implications of streamlining theory for microbial ecology. *The ISME*  
707 *Journal* **8**: 1553–1565.
- 708 Harrell, F.E., Jr and Dupont, C. Hmisc: Harrell Miscellaneous.
- 709 Hartwell, L.H., Hopfield, J.J., Leibler, S., and Murray, A.W. (1999) From  
710 molecular to modular cell biology. *Nature* **402**: C47–C52.
- 711 Hollibaugh, J.T., Gifford, S., Sharma, S., Bano, N., and Moran, M.A. (2011)  
712 Metatranscriptomic analysis of ammonia-oxidizing organisms in an  
713 estuarine bacterioplankton assemblage. *The ISME Journal* **5**: 866–878.
- 714 Jones, P., Binns, D., Chang, H.-Y., Fraser, M., Li, W., McAnulla, C., et al.  
715 (2014) InterProScan 5: genome-scale protein function classification.  
716 *Bioinformatics* **30**: 1236–1240.
- 717 Karner, M.B., Delong, E.F., and Karl, D.M. (2001) Archaeal dominance in  
718 the mesopelagic zone of the Pacific Ocean. *Nature* **409**: 507–510.
- 719 Kelley, L.A., Mezulis, S., Yates, C.M., Wass, M.N., and Sternberg, M.J.E.  
720 (2015) The Phyre2 web portal for protein modeling, prediction and  
721 analysis. *Nat Protoc* **10**: 845–858.

- 722 Kerou, M., Offre, P., Valledor, L., Abby, S.S., Melcher, M., Nagler, M., et al.  
723 (2016) Proteomics and comparative genomics of *Nitrososphaera*  
724 *viennensis* reveal the core genome and adaptations of archaeal  
725 ammonia oxidizers. *Proc. Natl. Acad. Sci. U.S.A.* 201601212–19.
- 726 Kiley, P.J. and Beinert, H. (2003) The role of Fe–S proteins in sensing and  
727 regulation in bacteria. *Current Opinion in Microbiology* **6**: 181–185.
- 728 Klein, D. and Pramer, D. (1961) Bacterial dissimilation of streptomycin.  
729 *Journal of Bacteriology* **82**: 505–510.
- 730 Kozlowski, J.A., Stieglmeier, M., Schleper, C., Klotz, M.G., and Stein, L.Y.  
731 (2016) Pathways and key intermediates required for obligate aerobic  
732 ammonia-dependent chemolithotrophy in bacteria and  
733 Thaumarchaeota. *The ISME Journal* **10**: 1836–1845.
- 734 Laczny, C.C., Sternal, T., Plugaru, V., Gawron, P., Atashpendar, A.,  
735 Margossian, H., et al. (2015) VizBin - an application for reference-  
736 independent visualization and human-augmented binning of  
737 metagenomic data. *Microbiome* **3**: 1–7.
- 738 Lam, P., Cowen, J.P., and Jones, R.D. (2004) Autotrophic ammonia  
739 oxidation in a deep-sea hydrothermal plume. *FEMS Microbiology*  
740 *Ecology* **47**: 191–206.
- 741 Lam, P., Lavik, G., Jensen, M.M., van de Vossenberg, J., Schmid, M.,  
742 Woebken, D., et al. (2009) Revising the nitrogen cycle in the Peruvian  
743 oxygen minimum zone. *Proc. Natl. Acad. Sci. U.S.A.* **106**: 4752–4757.
- 744 Li, D.-C., Yang, F., Lu, B., Chen, D.-F., and Yang, W.-J. (2011)  
745 Thermotolerance and molecular chaperone function of the small heat  
746 shock protein HSP20 from hyperthermophilic archaeon, *Sulfolobus*  
747 *solfataricus* P2. *Cell Stress and Chaperones* **17**: 103–108.
- 748 Lindås, A.-C., Karlsson, E.A., Lindgren, M.T., Ettema, T.J.G., and  
749 Bernander, R. (2008) A unique cell division machinery in the Archaea.  
750 *Proc. Natl. Acad. Sci. U.S.A.* **105**: 18942–18946.
- 751 Lunde, E., de Andrade, M., Atkinson, B., and Votruba, P. multic:  
752 Quantitative linkage analysis tools using the variance  
753 components approach.
- 754 Martens-Habbena, W., Qin, W., Horak, R.E.A., Urakawa, H., Schauer, A.J.,  
755 Moffett, J.W., et al. (2015) The production of nitric oxide by marine  
756 ammonia-oxidizing archaea and inhibition of archaeal ammonia  
757 oxidation by a nitric oxide scavenger. *Environmental Microbiology* **17**:  
758 2261–2274.
- 759 Mortazavi, A., Williams, B.A., McCue, K., Schaeffer, L., and Wold, B.

- 760 (2008) Mapping and quantifying mammalian transcriptomes by RNA-  
761 Seq. *Nat Meth* **5**: 621–628.
- 762 Nakagawa, T. and Stahl, D.A. (2013) Transcriptional response of the  
763 archaeal ammonia oxidizer *Nitrosopumilus maritimus* to low and  
764 environmentally relevant ammonia concentrations. *Applied and*  
765 *Environmental Microbiology* **79**: 6911–6916.
- 766 Nurk, S., Meleshko, D., Korobeynikov, A., and Pevzner, P.A. (2017)  
767 metaSPAdes: a new versatile metagenomic assembler. *Genome*  
768 *Research* **27**: 824–834.
- 769 Pedneault, E., Galand, P.E., Potvin, M., Tremblay, J.-É., and Lovejoy, C.  
770 (2014) Archaeal *amoA* and *ureC* genes and their transcriptional activity  
771 in the Arctic Ocean. *Sci. Rep.* **4**: 1–11.
- 772 Pellitteri-Hahn, M.C., Halligan, B.D., Scalf, M., Smith, L., and Hickey, W.J.  
773 (2011) Quantitative proteomic analysis of the chemolithoautotrophic  
774 bacterium *Nitrosomonas europaea*: Comparison of growing- and  
775 energy-starved cells. *Journal of Proteomics* **74**: 411–419.
- 776 Pitcher, A., Villanueva, L., Hopmans, E.C., Schouten, S., Reichart, G.-J.,  
777 and Sinninghe Damsté, J.S. (2011) Niche segregation of ammonia-  
778 oxidizing archaea and anammox bacteria in the Arabian Sea oxygen  
779 minimum zone. *The ISME Journal* **5**: 1896–1904.
- 780 Price, N.M. and Harrison, P.J. (1987) Comparison of methods for the  
781 analysis of dissolved urea in seawater. *Marine Biology* **94**: 307–317.
- 782 Qin, W., Amin, S.A., Lundeen, R.A., Heal, K.R., Martens-Habbena, W.,  
783 Turkarslan, S., et al. (2017) Stress response of a marine ammonia-  
784 oxidizing archaeon informs physiological status of environmental  
785 populations. *The ISME Journal* 1–12.
- 786 Qin, W., Amin, S.A., Martens-Habbena, W., Walker, C.B., Urakawa, H.,  
787 Devol, A.H., et al. (2014) Marine ammonia-oxidizing archaeal isolates  
788 display obligate mixotrophy and wide ecotypic variation. *Proc. Natl.*  
789 *Acad. Sci. U.S.A.* **111**: 12504–12509.
- 790 Robinson, M.D. and Smyth, G.K. (2008) Small-sample estimation of  
791 negative binomial dispersion, with applications to SAGE data.  
792 *Biostatistics* **9**: 321–332.
- 793 Santoro, A.E. and Casciotti, K.L. (2011) Enrichment and characterization of  
794 ammonia-oxidizing archaea from the open ocean: phylogeny,  
795 physiology and stable isotope fractionation. *The ISME Journal* **5**: 1796–  
796 1808.
- 797 Santoro, A.E., Buchwald, C., McIlvin, M.R., and Casciotti, K.L. (2011)

- 798 Isotopic signature of N<sub>2</sub>O produced by marine ammonia-oxidizing  
799 archaea. *Science* **333**: 1282–1285.
- 800 Santoro, A.E., Casciotti, K.L., and Francis, C.A. (2010) Activity, abundance  
801 and diversity of nitrifying archaea and bacteria in the central California  
802 Current. *Environmental Microbiology* **12**: 1989–2006.
- 803 Santoro, A.E., Dupont, C.L., Richter, R.A., Craig, M.T., Carini, P., McIlvin,  
804 M.R., et al. (2015) Genomic and proteomic characterization of  
805 “*Candidatus Nitrosopelagicus brevis*”: an ammonia-oxidizing archaeon  
806 from the open ocean. *Proc. Natl. Acad. Sci. U.S.A.* **112**: 1173–1178.
- 807 Satinsky, B.M., Smith, C.B., Sharma, S., Ward, N.D., Krusche, A.V.,  
808 Richey, J.E., et al. (2017) Patterns of Bacterial and Archaeal gene  
809 expression through the lower Amazon River. *Front. Mar. Sci.* **4**: 1937–  
810 15.
- 811 Schattenhofer, M., Fuchs, B.M., Amann, R., Zubkov, M.V., Tarran, G.A.,  
812 and Pernthaler, J. (2009) Latitudinal distribution of prokaryotic  
813 picoplankton populations in the Atlantic Ocean. *Environmental*  
814 *Microbiology* **11**: 2078–2093.
- 815 Schmieder, R., Lim, Y.W., and Edwards, R. (2011) Identification and  
816 removal of ribosomal RNA sequences from metatranscriptomes.  
817 *Bioinformatics* **28**: 433–435.
- 818 Shi, Y., Tyson, G.W., Eppley, J.M., and DeLong, E.F. (2010) Integrated  
819 metatranscriptomic and metagenomic analyses of stratified microbial  
820 assemblages in the open ocean. *The ISME Journal* **5**: 999–1013.
- 821 Smith, D.P., Kitner, J.B., Norbeck, A.D., Clauss, T.R., Lipton, M.S.,  
822 Schwalbach, M.S., et al. (2010) Transcriptional and translational  
823 regulatory responses to iron limitation in the globally distributed marine  
824 bacterium ‘*Candidatus Pelagibacter ubique*’. *PLoS ONE* **5**: e10487–10.
- 825 Smith, D.P., Nicora, C.D., Carini, P., Lipton, M.S., Norbeck, A.D., Smith,  
826 R.D., and Giovannoni, S.J. (2016) Proteome remodeling in response to  
827 sulfur limitation in “*Candidatus Pelagibacter ubique*.” *mSystems* **1**:  
828 e00068–16–15.
- 829 Smith, D.P., Thrash, J.C., Nicora, C.D., Lipton, M.S., Burnum-Johnson,  
830 K.E., Carini, P., et al. (2013) Proteomic and transcriptomic analyses of  
831 “*Candidatus Pelagibacter ubique*” describe the first PII-independent  
832 response to nitrogen limitation in a free-living Alphaproteobacterium.  
833 *mBio* **4**: e00133–12.
- 834 Smith, J.M., Casciotti, K.L., Chavez, F.P., and Francis, C.A. (2014)  
835 Differential contributions of archaeal ammonia oxidizer ecotypes to

- 836 nitrification in coastal surface waters. *The ISME Journal* **8**: 1704–1714.
- 837 Spang, A., Poehlein, A., Offre, P., Zumbärgel, S., Haider, S., Rychlik, N., et  
838 al. (2012) The genome of the ammonia-oxidizing '*Candidatus*  
839 *Nitrososphaera gargensis*': insights into metabolic versatility and  
840 environmental adaptations. *Environmental Microbiology* **14**: 3122–3145.
- 841 Spang, A., Saw, J.H., Jørgensen, S.L., Zaremba-Niedzwiedzka, K., Martijn,  
842 J., Lind, A.E., et al. (2015) Complex archaea that bridge the gap  
843 between prokaryotes and eukaryotes. *Nature* **521**: 173–179.
- 844 Stahl, D.A. and la Torre, de, J.R. (2012) Physiology and diversity of  
845 ammonia-oxidizing archaea. *Annu. Rev. Microbiol.* **66**: 83–101.
- 846 Stewart, F.J., Ulloa, O., and DeLong, E.F. (2012) Microbial  
847 metatranscriptomics in a permanent marine oxygen minimum zone.  
848 *Environmental Microbiology* **14**: 23–40.
- 849 Stieglmeier, M., Mooshammer, M., Kitzler, B., Wanek, W., Zechmeister-  
850 Boltenstern, S., Richter, A., and Schleper, C. (2014) Aerobic nitrous  
851 oxide production through N-nitrosating hybrid formation in ammonia-  
852 oxidizing archaea. *The ISME Journal* **8**: 1135–1146.
- 853 Storey, J.D. and Tibshirani, R. (2003) Statistical significance for  
854 genomewide studies. *Proc. Natl. Acad. Sci. U.S.A.* **100**: 9440–9445.
- 855 Strickland, J.D.H. and Parsons, T.R. (1972) A Practical Handbook of  
856 Seawater Analysis. 2.ed.
- 857 Tolar, B.B., Ross, M.J., Wallsgrove, N.J., Liu, Q., Aluwihare, L.I., Popp,  
858 B.N., and Hollibaugh, J.T. (2016) Contribution of ammonia oxidation to  
859 chemoautotrophy in Antarctic coastal waters. *The ISME Journal* **10**:  
860 2605–2619.
- 861 Tolar, B.B., Wallsgrove, N.J., Popp, B.N., and Hollibaugh, J.T. (2016)  
862 Oxidation of urea-derived nitrogen by thaumarchaeota-dominated  
863 marine nitrifying communities. *Environmental Microbiology*.
- 864 Tripp, H.J. (2008) Counting marine microbes with Guava Easy-Cyte 96 well  
865 plate reading flow cytometer. *Protocol Exchange*.
- 866 Vajrala, N., Martens-Habbena, W., Sayavedra-Soto, L.A., Schauer, A.,  
867 Bottomley, P.J., Stahl, D.A., and Arp, D.J. (2013) Hydroxylamine as an  
868 intermediate in ammonia oxidation by globally abundant marine  
869 archaea. *Proc. Natl. Acad. Sci. U.S.A.* **110**: 1006–1011.
- 870 Walker, C.B., la Torre, de, J.R., Klotz, M.G., Urakawa, H., Pinel, N., Arp,  
871 D.J., et al. (2010) *Nitrosopumilus maritimus* genome reveals unique  
872 mechanisms for nitrification and autotrophy in globally distributed  
873 marine crenarchaea. *Proc. Natl. Acad. Sci. U.S.A.* **107**: 8818–8823.

- 874 Wei, X., Yan, T., Hommes, N.G., Liu, X., Wu, L., McAlvin, C., et al. (2006)  
875 Transcript profiles of *Nitrosomonas europaea* during growth and upon  
876 deprivation of ammonia and carbonate. *FEMS Microbiology Letters* **257**:  
877 76–83.
- 878 Williams, T.J., Long, E., Evans, F., DeMaere, M.Z., Lauro, F.M., Raftery,  
879 M.J., et al. (2012) A metaproteomic assessment of winter and summer  
880 bacterioplankton from Antarctic Peninsula coastal surface waters. *The*  
881 *ISME Journal* **6**: 1883–1900.
- 882 Yakimov, M.M., La Cono, V., Smedile, F., DeLuca, T.H., rez, S.J.A.,  
883 Ciordia, S., et al. (2011) Contribution of crenarchaeal autotrophic  
884 ammonia oxidizers to the dark primary production in Tyrrhenian deep  
885 waters (Central Mediterranean Sea). *The ISME Journal* **5**: 945–961.
- 886 Zhao, Y., Wu, J., Yang, J., Sun, S., Xiao, J., and Yu, J. (2011) PGAP: pan-  
887 genomes analysis pipeline. *Bioinformatics* **28**: 416–418.  
888  
889



890 **Figures:**

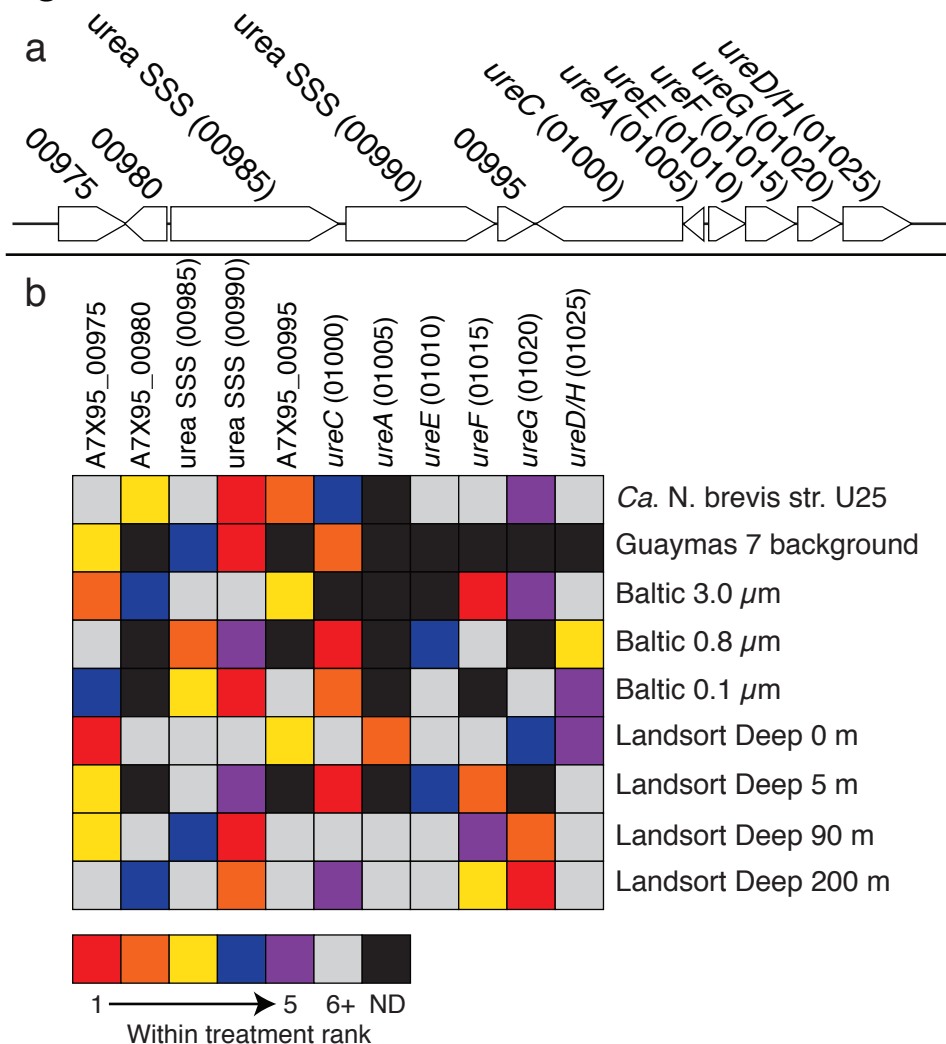

891 **Figure 1:** Urea transport and catalysis genes are frequently the most highly  
 892 expressed *Ca. N. brevis* U25-specific genes. (a) Chromosomal orientation  
 893 of the *Ca. N. brevis* str. U25 indel conferring urea transport and catalysis  
 894 capability. (b) Heatmap illustrating the relative rank expression level of the  
 895 five most abundant genes within the urea indel region for culture  
 896 experiments and environmental metatranscriptomes. Rank was calculated  
 897 within a given treatment from RPKM normalized expression values, where  
 898 a rank of 1 is the most abundant transcript of the genes contained in the  
 899 indel. The mean expression (n=3 replicates) value was used for ranking the  
 900 culture treatment. ND=Not detected. Note this is not the rank of the  
 901 transcript within the entire metatranscriptome. Some metatranscriptomes  
 902 were excluded because they did not have sufficient coverage of the urea  
 903 transport and catabolism machinery. Numbers in parentheses after gene  
 904 names refer to A7X95 locus tags.

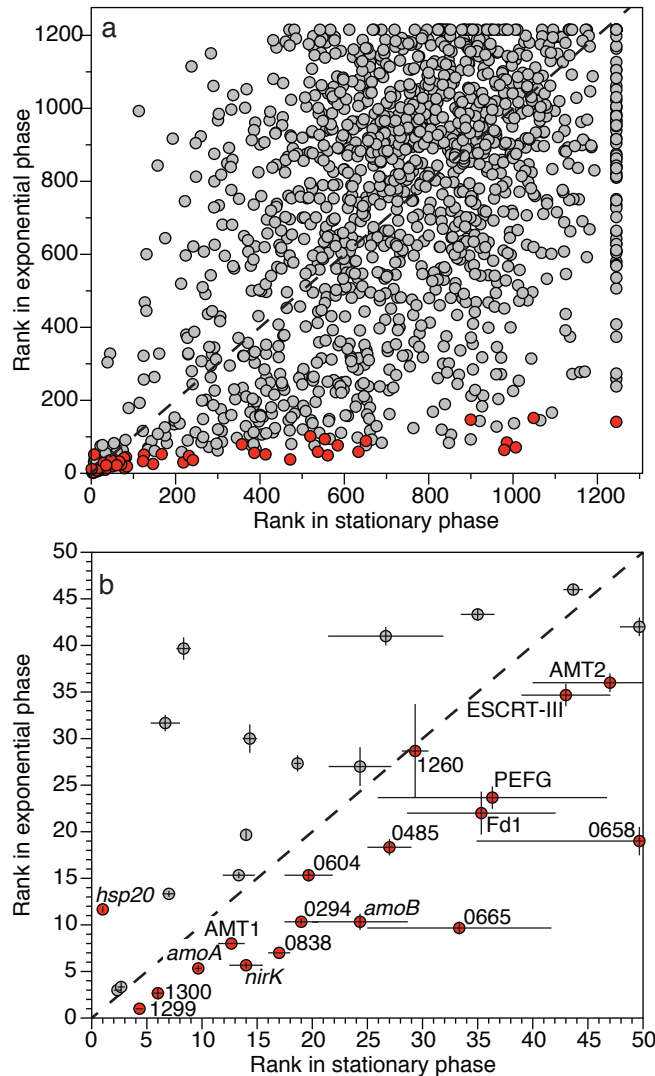

906

907

908

909

910

911

912

913

914

915

916

917

918

919

920

**Figure 2:** Highly expressed *Ca. N. brevis* str. CN25 transcripts in exponential phase are also highly expressed in stationary phase, despite significant differences in abundance. (a) Points are the mean rank ( $n=3$ ) of RPKM normalized expression values for all genes in exponential and stationary growth phases. Red points are transcripts that were significantly differentially abundant across treatments (Supplementary Table 2). The abundances of grey points were not significantly different across treatments. Dashed line is 1:1 line indicating no change in rank. (b) Subset of panel (a), illustrating the rank of transcripts that are in the top 50 most abundant transcripts in both exponential and stationary phase. Points in (b) are the mean rank and error bars represent  $\pm$  SE ( $n=3$ ). Gene transcript abundances in (b) that were significantly different across treatments are labeled and colored red. The 'T478\_' prefix is omitted from labels of genes annotated as 'hypothetical'. PEFG corresponds to T478\_0596.

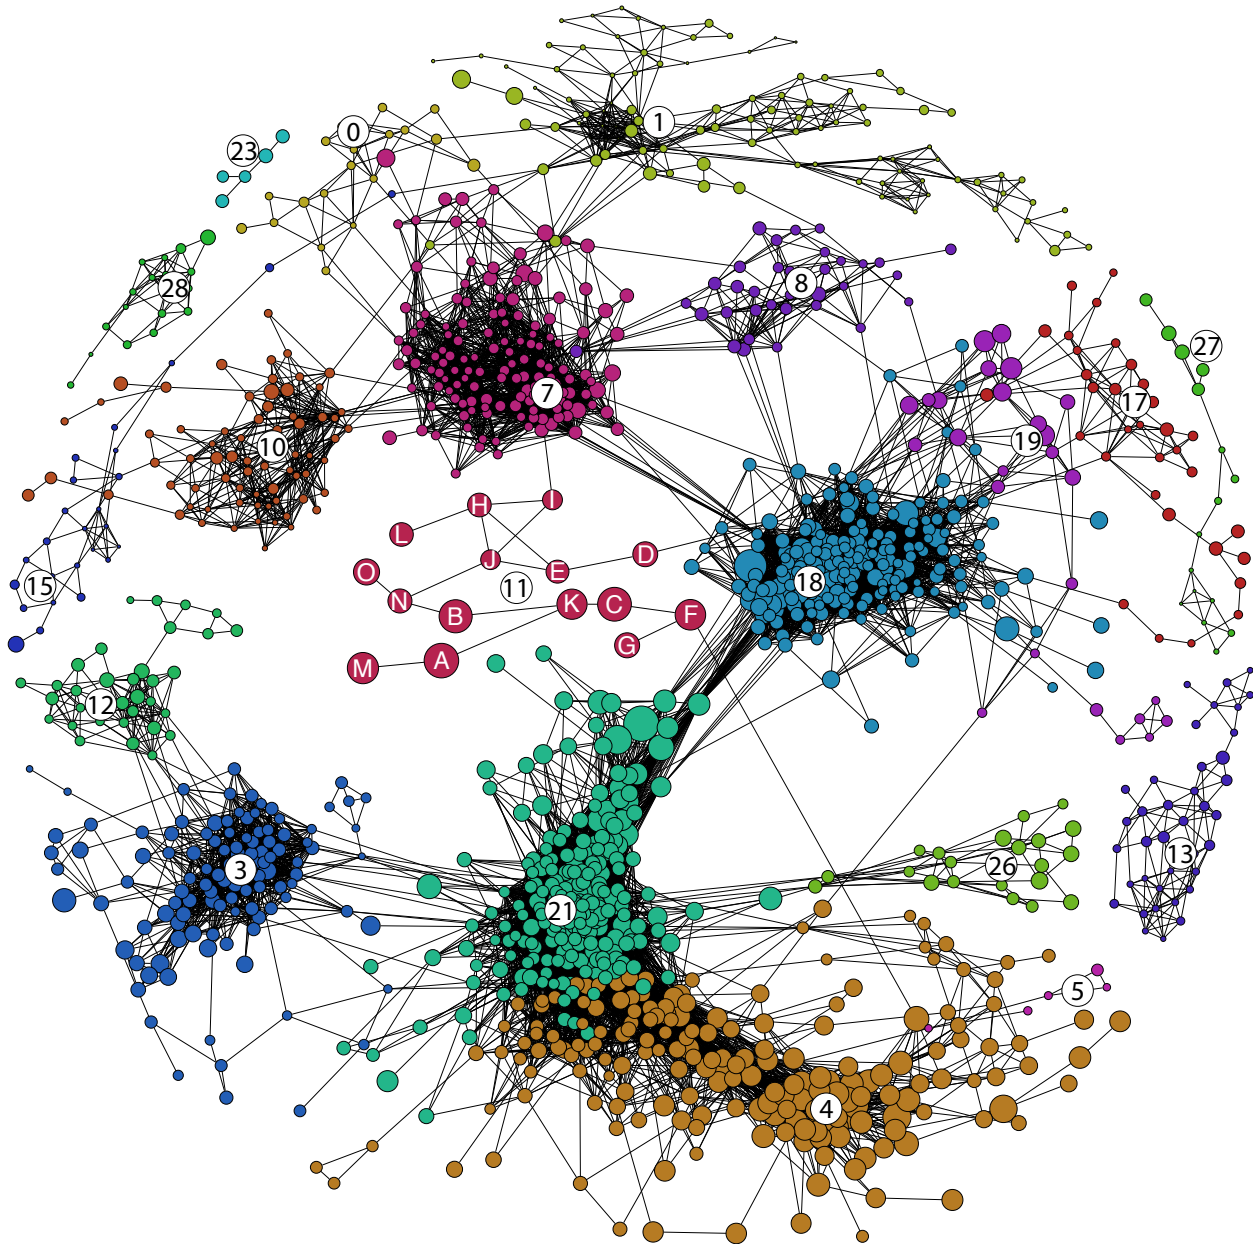

#### Module 11 (AMO module) membership details

|                                     |                                         |
|-------------------------------------|-----------------------------------------|
| A: <i>amoA</i> (0302)               | I: ESCRT-III (0057)                     |
| B: <i>amoB</i> (0298)               | J: PEFG-CTERM (0270)                    |
| C: <i>amoC</i> (0300)               | K: <i>nirK</i> (1026)                   |
| D: Membrane-bound cupredoxin (0895) | L: <i>amoX</i> (0301)                   |
| E: 0487                             | M: AMT1 (1378)                          |
| F: Fd1 (1472)                       | N: Cupredoxin PEFG-CTERM (1362)         |
| G: Fd2 (1259)                       | O: Fe-S cluster assembly protien (1056) |
| H: 1317                             |                                         |

921

922

923

924

925

**Figure 3:** Thaumarchaeal gene expression is highly modular and ammonia oxidation genes are co-expressed. Network diagram of strong and significant (Pearson's  $r \geq 0.8$ ,  $q$  value  $\leq 0.025$ ) positive correlations across ten environmental metatranscriptomes and the *Ca. N. brevis* U25

926 transcriptome depicted in Fig. 1 and a *Ca. N. brevis* CN25 transcriptome  
927 from a culture initiated with 100  $\mu$ M NH<sub>4</sub>Cl (12 conditions total, see  
928 methods). Individual nodes are genes. Nodes are sized by the mean  
929 normalized rank abundance (VdW scores), whereby larger nodes are more  
930 abundant transcripts on average. Nodes are colored by module  
931 membership. Circled numbers are the module identity (Supplementary  
932 Table 3). The module 11 (the AMO module) genes are identified by letters  
933 A-O; their annotations are provided below network. Numbers in  
934 parentheses refer to T478 locus tags. Only modules with five or more  
935 nodes are shown for clarity; see Supplementary Table 3 for all module  
936 membership details.  
937

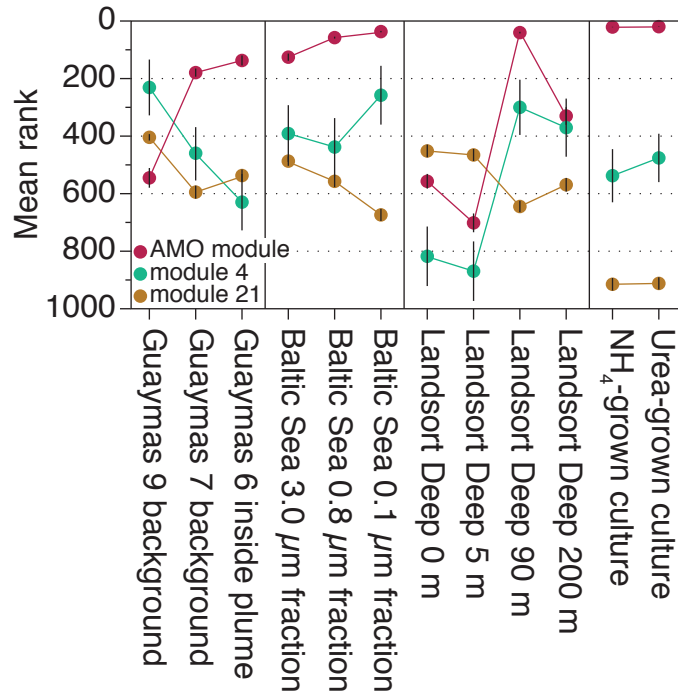

938

939

940

941

942

943

944

945

**Fig. 4:** Natural variability in the mean rank of expression modules across environments and culture conditions. Points are the average rank of all genes contained within a given module at each site; error bars are  $\pm$  SE. On average, the AMO module and modules 36, 4 and 21 rank the highest (that is, they are the most abundant) across all sites. Module 36 is not displayed because it is only comprised of two genes, which prevents statistical analysis, and these genes are absent in the U25 genome.
